## Review Article

# Phosphoinositide lipids in primary cilia biology

 Sarah E. Conduit and Bart Vanhaesebroeck

UCL Cancer Institute, University College London, 72 Huntley Street, London WC1E 6BT, U.K.

**Correspondence:** Sarah E. Conduit ([s.conduit@ucl.ac.uk](mailto:s.conduit@ucl.ac.uk)) or Bart Vanhaesebroeck ([bart.vanh@ucl.ac.uk](mailto:bart.vanh@ucl.ac.uk))

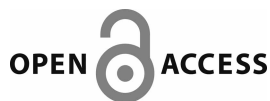

Primary cilia are solitary signalling organelles projecting from the surface of most cell types. Although the ciliary membrane is continuous with the plasma membrane it exhibits a unique phospholipid composition, a feature essential for normal cilia formation and function. Recent studies have illustrated that distinct phosphoinositide lipid species localise to specific cilia subdomains, and have begun to build a ‘phosphoinositide map’ of the cilium. The abundance and localisation of phosphoinositides are tightly regulated by the opposing actions of lipid kinases and lipid phosphatases that have also been recently discovered at cilia. The critical role of phosphoinositides in cilia biology is highlighted by the devastating consequences of genetic defects in cilia-associated phosphoinositide regulatory enzymes leading to ciliopathy phenotypes in humans and experimental mouse and zebrafish models. Here we provide a general introduction to primary cilia and the roles phosphoinositides play in cilia biology. In addition to increasing our understanding of fundamental cilia biology, this rapidly expanding field may inform novel approaches to treat ciliopathy syndromes caused by deregulated phosphoinositide metabolism.

## Introduction

Phosphoinositides are minor membrane lipids that regulate critical cell biological processes, largely by dictating protein localisation and activity. Phosphoinositides are built around the phosphatidylinositol (PtdIns) building block (Figure 1A) by phosphorylation at different sites of the inositol ring. This gives rise to multiple species of phosphoinositides which show a characteristic distribution over different compartments of the cell, including the plasma membrane and internal membranous organelles, thereby defining membrane identity (Figure 1B) [1–3]. Phosphoinositides have been extensively studied for the last 50 years, however, only recently has a previously unappreciated subcellular localisation and function for these lipids emerged at the primary cilium [4–10].

The importance of phosphoinositides in regulation of primary cilia was first recognised in 2009 when seminal studies by Jacoby et al. [11] and Bielas et al. [12] identified that mutations in the inositol polyphosphate 5-phosphatase *INPP5E* are causally implicated in two ciliopathy syndromes. However, it took another six years until the first phosphoinositides [PtdIns(4)P and PtdIns(4,5)P<sub>2</sub>] were shown to localise to the ciliary membrane [4,5].

Collectively, PtdIns(4)P, PtdIns(4,5)P<sub>2</sub>, PtdIns(3,4,5)P<sub>3</sub> (also known as PIP<sub>3</sub>) and PtdIns(3,4)P<sub>2</sub> have since been identified in cilia membrane subdomains, with PtdIns(3)P found at a cilia-associated endosomal compartment and PtdIns(4)P detected at the centrosome prior to cilia assembly [4–10]. This review will explore the localisation and function of these phosphoinositides and their regulatory enzymes in primary cilia subdomains. We will begin by defining the structure of the primary cilium, which is compartmentalised into domains with distinct phosphoinositide compositions and describe the critical role of cilia in cell and developmental biology. Phosphoinositides will then be introduced and their emerging roles in cilia biology and the effects of mutation or deletion of the ciliary lipid kinases and phosphatases discussed. For more details on phosphoinositide function and regulation outside the cilium the reader is referred to the following excellent recent reviews [1–3,13–15].

Received: 12 June 2020  
 Revised: 30 July 2020  
 Accepted: 27 August 2020

Version of Record published:  
 24 September 2020

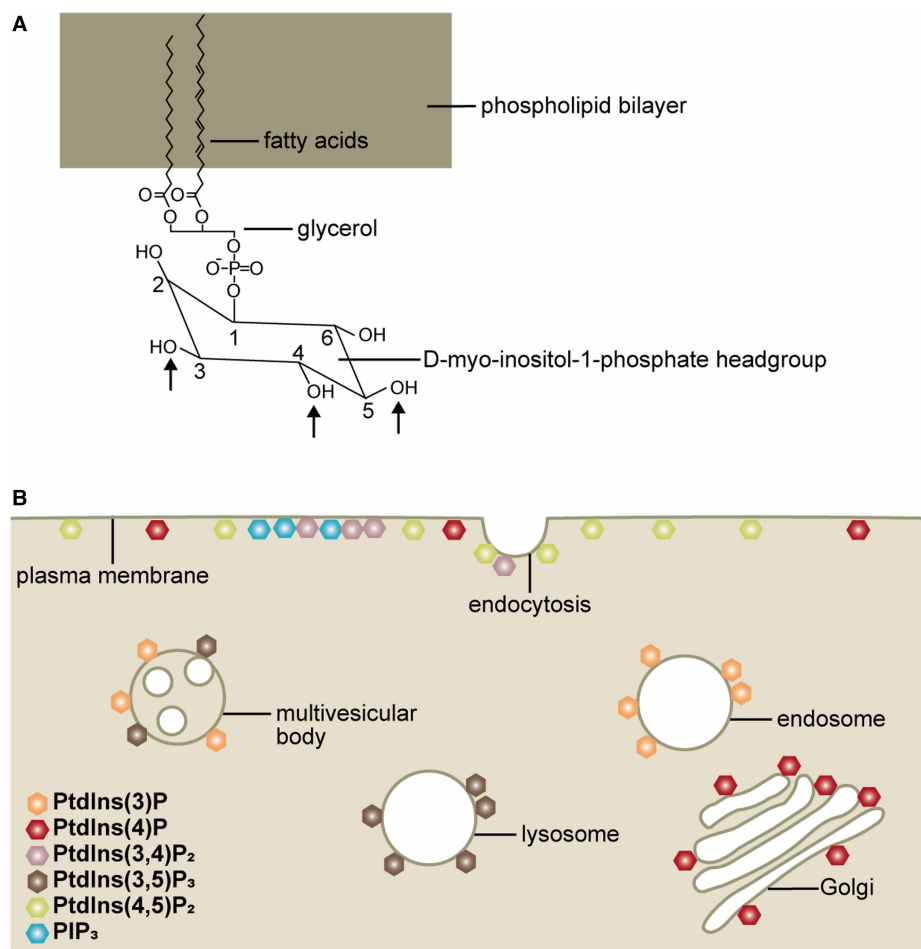

**Figure 1. Localisation of phosphoinositides defines membrane identity.**

(A) Structure of PtdIns, arrows highlight the 3-, 4- and 5-positions of the inositol ring which can be phosphorylated. (B) Distinct phosphoinositides localise to the cytoplasmic leaflet of specific membrane domains and thereby confer membrane identity and control trafficking and signalling events. The major phosphoinositides at the membrane domains are depicted. PtdIns(4,5)P<sub>2</sub> is the major species at the plasma membrane, although lower levels of PtdIns(4)P are also detected and PIP<sub>3</sub> and PtdIns(3,4)P<sub>2</sub> are transiently produced following growth factor stimulation. The endocytic membranes are predominantly decorated by PtdIns(3)P which is converted to PtdIns(3,5)P<sub>3</sub> as vesicles progress through the endocytic network to the multivesicular body and lysosome. PtdIns(4)P is the major Golgi-resident phosphoinositide.

## Primary cilia

### Primary cilia structure

Primary cilia are microtubule-based organelles projecting from the surface of most non-dividing cells that concentrate signalling molecules and are critical for transduction of multiple signalling pathways [16]. A cell expresses a single primary cilium. In contrast, specialised cell types often exhibit multiple motile (secondary) cilia, which actively move to generate water movement, resulting in fluid flow or cell motility. Phosphoinositides have not been examined in the context of motile cilia, this review will therefore focus on the role and localisation of phosphoinositides at primary cilia.

The primary cilium consists of the so-called axoneme made up of microtubules arranged as nine doublets (9 + 0, as opposed to the 9 + 2 microtubule arrangement of motile cilia which have an additional central pair) anchored by a modified mother centriole, termed the basal body (Figure 2). The ciliary membrane ensheathes the axoneme and although continuous with the plasma membrane, it is enriched with specific proteins and

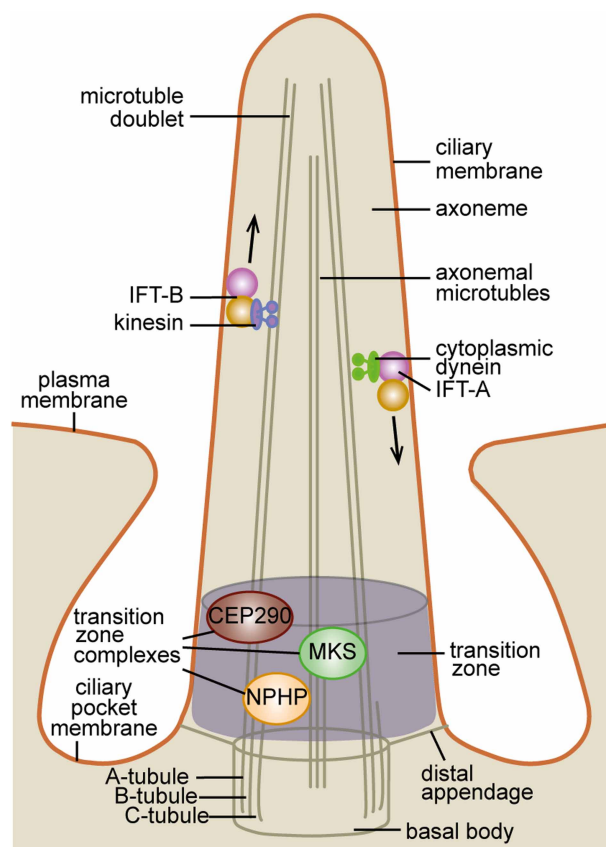

**Figure 2. Primary cilia structure.**

The primary cilium is built around a scaffold of microtubules known as the axoneme. The microtubules that make up the axoneme are arranged as nine doublets (each doublet contains an A tubule and a B tubule). At the base, the axoneme is anchored by the basal body. The basal body is a modified mother centriole which has acquired distal appendage proteins that it uses to dock with the plasma membrane. It consists of nine microtubule triplets (A–C tubules). The axoneme is covered by the ciliary membrane, a membrane domain continuous with the plasma membrane but separated by a diffusion barrier. The ciliary membrane originates from Golgi-derived pre-ciliary vesicles and exhibits a unique lipid and protein composition relative to the plasma membrane. The membrane domain between the ciliary membrane and the plasma membrane is known as the ciliary pocket and is proposed to be the site where cargo from the endocytic network enter the ciliary membrane. A diffusion barrier at proximal end of the axoneme allows the cilium to maintain autonomy from the rest of the cytoplasm. The diffusion barrier is made up of three multi-protein complexes (MKS, NPHP and CEP290) at the transition zone, phosphoinositide binding Septins and the basal body distal appendages proteins (also known as transition fibres). The primary cilium does not synthesise its own protein components, therefore all proteins must be trafficked into and within the cilium. The IFT system mediates trafficking within the cilium. Kinesin microtubule motors walk along the axonemal microtubules and mediate anterograde IFT in complex with the IFT-B proteins which bind cargo molecules. Conversely, retrograde IFT is mediated by the microtubule motor cytoplasmic dynein and the IFT-A complex.

phospholipids. Indeed, as explained below, the ciliary membrane is derived from an endomembrane not the plasma membrane.

The region at the cilia base between the axoneme and basal body is defined as the transition zone and is made up of the MKS, NPHP and CEP290 multi-protein complexes (reviewed in [17]). These complexes act as a diffusion barrier that controls the entry and retention of membrane and soluble molecules [18,19]. The transition zone complexes are made up of multiple transmembrane, membrane-associated and soluble proteins that depend on one another for ciliary localisation [18,19]. Interestingly, many transition zone proteins such as AHI1, NPHP4, NPHP1, NPHP8, CC2D2A and RPGRIP1L contain phosphoinositide binding domains [18,20]

but the identity of their lipid binding partners *in vivo* and the significance of these interactions are unclear. Mutations in transition zone proteins lead to major defects in primary cilia function such as disruption of assembly or failure of ciliary proteins to concentrate within the axoneme [18,19].

*In vitro* primary cilia assemble in a process also known as ciliogenesis (Figure 3(i–iii)) when cells exit the cell cycle, with cilia resorbed following growth factor stimulation (cilia disassembly; Figure 3(iv,v)), releasing the mother centriole to function as an anchor for the mitotic spindle [21]. Removal of serum from cell culture media is a well-established *in vitro* procedure to induce ciliogenesis. The *in vivo* initiating signal(s) is/are less well established but are thought to be via the induction of a ciliary transcriptional network promoting cilia gene expression [22].

Upon initiation of ciliogenesis, Golgi-derived pre-ciliary vesicles are recruited to and dock with the mother centriole [23]. The pre-ciliary vesicles fuse via SNARE protein interactions to form the ciliary vesicle, the mother centriole acquires distal appendage proteins to differentiate into the basal body and the transition zone complexes are recruited [24]. Microtubules assemble from the basal body and extension of the overlying ciliary vesicle occurs via fusion of additional vesicles, resulting in the formation of a nascent axoneme within the cytoplasm, covered by a double lipid bilayer. The ciliary vesicle eventually fuses with the plasma membrane in a process mediated by the formation of membrane deforming protein EHD1- and PACSIN1-decorated tubular membranes connecting these membrane domains [25]. This releases the nascent cilium which is now covered

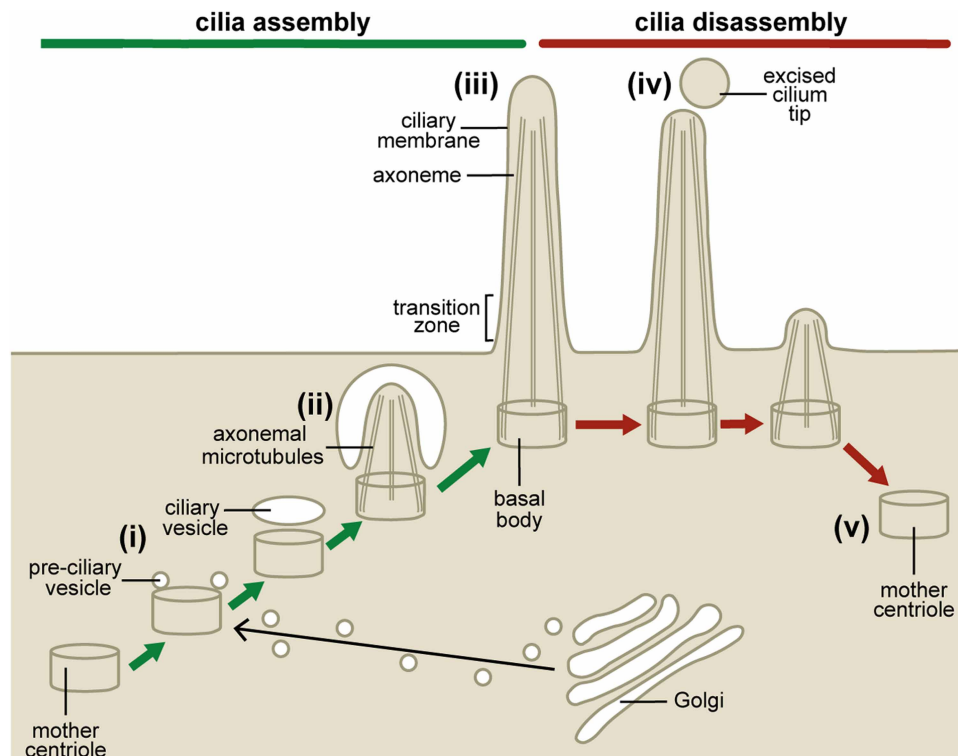

**Figure 3. Primary cilia dynamics.**

Primary cilia assembly occurs when cells exit the cell cycle or in response to developmental signals. (i) Golgi-derived pre-ciliary vesicles dock with the mother centriole and fuse to become the ciliary vesicle. The mother centriole differentiates into the basal body by the acquisition of accessory structures and microtubule capping protein CP110 is removed to enable microtubule elongation. (ii) A nascent cilium is formed within the cytosol by microtubule assembly from the basal body which is covered by the double membrane ciliary vesicle. (iii) Finally the ciliary vesicle fuses with the plasma membrane to reveal the mature cilium projecting into the extracellular space. (iv) Primary cilia disassemble as cells progress through the cell cycle in response to growth factor stimulation. Disassembly occurs via microtubule destabilisation and disassembly. Cilia decapitation also contributes to disassembly by removing positive regulators of cilia maintenance. (v) Once the cilium has disassembled the mother centriole is released for mitotic spindle formation.

by a single membrane, the ciliary membrane [23]. All proteins required for cilia assembly and function must be trafficked into and out of the cilium from the cytoplasm, a process achieved by the intraflagellar transport (IFT) proteins and kinesin/dynein microtubule motors [26].

The process of cilia disassembly is less well characterised but is known to rely on microtubule destabilisation (including by deacetylation) and disassembly for which Aurora kinase A and its substrate histone deacetylase 6 are key players (Figure 3(iv,v)) [27,28]. Actin-dependent decapitation of the cilia tip, whereby the tip is released from the cell as a vesicle, has also recently emerged as a cilia disassembly-promoting event by removing IFT components [29], and is described in further detail below in the context of its regulation by phosphoinositides.

## Ciliopathy syndromes

Mutations in ciliary proteins cause a phenotypic spectrum of developmental disorders known as ciliopathy syndromes, including Joubert syndrome, Meckel–Gruber syndrome, nephronophthisis and Bardet–Biedl syndrome (BBS), among others [30]. The importance of primary cilia in development and homeostasis is also illustrated by mouse models with deletion of key cilia genes which are associated with severe phenotypes and often embryonic lethality [30,31]. Characteristic ciliopathy disease and mouse model phenotypes include cognitive impairment, polycystic kidneys, polydactyly, blindness, obesity, infertility and frequently result from dysregulation of cilia signalling-dependent developmental patterning [17,30].

## Primary cilia signalling

One of the most widely studied functions of primary cilia is as a key compartment for multiple signalling pathways such as Hedgehog, planar cell polarity, WNT, G protein-coupled receptors (GPCRs) and receptor tyrosine kinases (RTKs) such as Platelet-Derived Growth Factor-Receptor (PDGFR), among others [32–36].

Importantly, many models with cilia dysfunction exhibit defective Hedgehog-dependent patterning (reviewed in [16]). Canonical Hedgehog signalling is absolutely dependent on a functional primary cilium, with its complex regulation shown in Figure 4 [32]. Hedgehog signalling ultimately results in a gene expression program mediated by the GLI transcriptional factors (GLI1, GLI2 and GLI3). In unstimulated cells GLI3 is proteolytically-processed to a transcriptional repressor (Figure 4A(v)) [37]. Stimulation of the pathway results in activation of the full-length transcriptional activator GLI2 (Figure 4B(v)) [38]. GLI1 is also a transcriptional activator but is only expressed following GLI2 activation forming a positive feedback loop [39].

In the absence of Hedgehog ligand, the inhibitory receptor Patched 1 (PTCH1) localises to the cilium and represses the GPCR-like protein Smoothened (SMO) via an incompletely understood mechanism possibly requiring ion gradients and cholesterol metabolism (Figure 4A(i,ii)) [40,41]. A negative regulator, called Suppressor of fused (SUFU), binds the GLI transcription factors and sequesters the full length activator forms in the cytosol (Figure 4A(iii)) [42]. The GPCR GPR161 is another negative regulator which localises to the cilium to promote GLI3 repressor formation by signalling through  $G\alpha_s$ /cAMP/PKA (Figure 4A(iv)) [36]. The GLI3 repressor localises to the nucleus to inhibit target gene expression (Figure 4A(v)) [37].

Binding of a Hedgehog ligand (Sonic, Indian or Desert Hedgehog) to PTCH1 results in PTCH1 movement out of the cilium (Figure 4B(i)) and de-repression of SMO which is activated and accumulates at the ciliary membrane (Figure 4B(ii)) [40,43,44]. Cilia localised active SMO removes GPR161 from cilia (Figure 4B(iii)) [36] and promotes the processing of GLI2 to a transcriptional activator at the cilia tip (Figure 4B(iv)), which traffics to the nucleus, overriding the transcriptional repressor activity of GLI3 [38]. Active GLI2 promotes target gene expression (Figure 4B(v)), including expression of *GLI1* and *PTCH1*, forming positive and negative feedback loops, respectively, as well as many cell cycle and cell type-specific patterning regulators [38,45,46].

Importantly, the cilium not only acts as a hub to localise and enable Hedgehog signal transduction, in the absence of ligand it also restrains the pathway via processing of GLI3 to a transcriptional repressor [47–49]. Therefore loss of cilia function phenotypes are often more complex than simply Hedgehog repression and may include the typical Hedgehog gain-of-function polydactyly phenotype [16,32,50].

## Phosphoinositides and their binding domains

PtdIns consists of a fatty acid and glycerol backbone with a D-myo-inositol-1-phosphate headgroup which is modified at the D3, D4 or D5 positions by lipid kinases and phosphatases to generate up to seven distinct lipid molecules (Figure 1A).

Non-phosphorylated PtdIns, the most abundant species, constitutes 15% of total cellular phospholipids and is synthesised in the endoplasmic reticulum prior to trafficking to various organelles for phosphorylation by

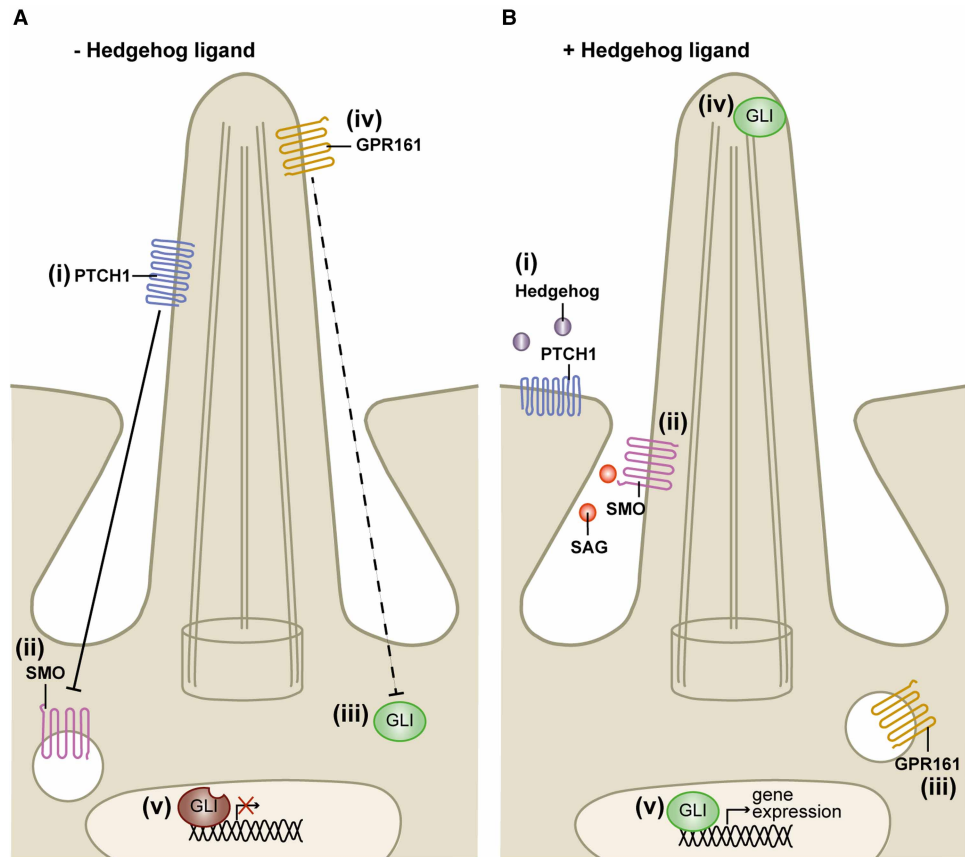

**Figure 4. Hedgehog signalling is initiated at primary cilia.**

(A) In the absence of Hedgehog ligand, (i) its receptor PTCH localises to the primary cilium and represses the pathway by (ii) sequestering the GPCR-like protein SMO out of the cilium. (iii) The GLI transcription factors are sequestered in the cytoplasm. (iv) The GPCR GPR161 localises to cilia and supports the processing of GLI to the proteolytically processed transcriptional repressor. (v) GLI repressors translocate to the nucleus to inhibit target gene expression. (B) (i) Hedgehog ligand binding to PTCH1 results in PTCH1 movement out of the cilium and (ii) de-repression of SMO, which now accumulates in the ciliary membrane. SMO may also be directly activated by the small molecule ligand SAG. (iii) These events result in exit of GPR161 from the cilia and (iv) GLI accumulation at the cilia tip where it becomes activated. (v) Active GLI then translocates to the nucleus to promote Hedgehog target gene expression.

resident kinases [51]. Even the most abundant phosphorylated phosphoinositide species are present at 10–20 fold lower levels compared with PtdIns [51]. The local phosphoinositide composition of an organelle membrane or subdomain is tightly regulated by phosphorylation/dephosphorylation events and lipid transport proteins. Specific phosphoinositides localise to the cytoplasmic surface of the plasma membrane and membranous organelles thereby defining membrane identity (Figure 1B).

PtdIns(4,5)P<sub>2</sub> is the most abundant species at the plasma membrane where it co-ordinates endocytosis and actin dynamics and serves as a substrate for phospholipase C and class I phosphoinositide 3-kinases (PI3Ks) (Figure 1B) [52–57]. PtdIns(3)P and PtdIns(4)P define endosomes and the trans-Golgi network, respectively (Figure 1B) [58,59]. In contrast with these constitutively-present membrane lipids, PIP<sub>3</sub> and PtdIns(3,4)P<sub>2</sub> are produced only transiently following growth factor stimulation (Figure 1B) [13,55].

Phosphoinositides dictate membrane identity and act by recruiting effector proteins via their lipid binding domains such as the Pleckstrin Homology (PH), FYVE, Phox and C2 domains. Below, we briefly discuss PH, C2 and the related but little characterised B9 domains, which are found in cilia-localised proteins.

PH domains are a widely distributed protein fold present in many diverse proteins [60]. A small subset of PH domains binds lipids, including PIP<sub>3</sub>, PtdIns(3,4)P<sub>2</sub>, PtdIns(4)P and/or PtdIns(4,5)P<sub>2</sub>, [61,62]. One of the

most well-studied phosphoinositide-binding PH domains is that in the AKT serine/threonine kinase, which facilitates the recruitment of this kinase to the plasma-membrane following the production of PIP<sub>3</sub>/PtdIns(3,4)P<sub>2</sub> by class I PI3Ks. Membrane recruitment brings AKT in proximity to the already membrane-bound PDK1 resulting in AKT phosphorylation on threonine 308 by PDK1 [63–65]. Both phosphorylated PDK1 and AKT have been identified at the cilia base [7,66].

C2 domains are found in at least 200 proteins, many of which regulate signalling and vesicle trafficking [67]. The C2 domain is an ~130 amino acid protein fold, some of which mediate lipid binding, although with less specificity compared with most PH domains [67,68]. Many cilia transition zone proteins contain C2 domains which are hypothesised to mediate protein-membrane interactions [20]. However, for many C2 domains the lipid binding properties and whether they indeed bind phosphoinositides at all remains unclear. For example, it is suggested that the negative charge of the C2 domains of the cilia-associated RPGRIP1L protein render it unlikely to bind phosphoinositides, but this has not been directly tested [69].

B9 domains are closely related to C2 domains and are found specifically in the transition zone proteins B9D1, B9D2 and MKS1, but have not yet been characterised in detail and their phosphoinositide binding properties are unknown [20,70].

## Cilia-associated phosphoinositide kinases and phosphatases

The following sections will introduce the cilia-associated phosphoinositide lipid kinases and phosphatases, summarising the evidence that they regulate cilia biology under normal conditions and are the subject of disease-associated mutations in humans (Figure 5 and Table 1).

### Regulation of ciliary phosphoinositides by PI-kinases

#### PI3K-C2 $\alpha$

PI3K-C2 $\alpha$  is a ubiquitously expressed class II PI3K which regulates endocytic trafficking [71]. PI3K-C2 $\alpha$  phosphorylates PtdIns and PtdIns(4)P to produce PtdIns(3)P and PtdIns(3,4)P<sub>2</sub> [9,72], with its substrate specificity possibly depending on the relative abundance of PtdIns and PtdIns(4)P at specific membrane sites. PI3K-C2 $\alpha$  localises to the cilia-associated pericentriolar recycling endocytic compartment (Figure 5) and is proposed to regulate cilia by modulating local PtdIns(3)P levels, as described in further detail below [9]. Deletion or knock-down of *Pik3c2a* (which encodes PI3K-C2 $\alpha$ ) reduces cilia length and impairs the trafficking of transmembrane proteins into cilia [9,73]. Homozygous *Pik3c2a* deletion in mice is embryonically lethal at embryonic day (E) 10.5–E11.5 with a phenotype characteristic of primary cilia and Hedgehog pathway dysfunction including reduced embryo size, failed embryonic turning and cardiac tube looping [9,74]. These embryos also show a phenotype of defective angiogenesis which is likely unrelated to the primary cilia defect [9,74]. Hedgehog ligand-stimulated Hedgehog signalling is impaired in *Pik3c2a*-depleted embryos and mouse embryonic fibroblasts (MEFs) [9]. Furthermore, heterozygous *Pik3c2a* deletion in several cystic kidney disease models exacerbates renal cyst formation, a typical ciliopathy phenotype [73].

A novel human syndrome defined by skeletal malformations, short stature, cataracts and developmental delay was recently associated with homozygous *PIK3C2A* mutations [75]. All mutations identified to date are thought to be loss-of-function and result in a loss of protein expression [75]. Many features of this syndrome are similar to classical ciliopathy syndromes [30] and closely resemble Lowe's syndrome, a ciliopathy-associated disorder with mutations in the cilia-localised 5-phosphatase *OCRL* discussed below [76,77]. Similar to *Pik3c2a*-null cells, *PIK3C2A* mutant human fibroblasts exhibit reduced cilia length, suggesting that this *PIK3C2A* mutant syndrome may represent a new ciliopathy [75].

#### PIPKI $\gamma$

Type I $\gamma$  PtdIns(4)P 5-kinase (PIPKI $\gamma$ ) localises to the mother centriole (cilia basal body) in ciliated (Figure 5) and non-ciliated cells and phosphorylates PtdIns(4)P to produce PtdIns(4,5)P<sub>2</sub> [10,78]. This kinase has also been shown to localise to and regulate endosomes and cell adhesion junctions and is required for signalling events [79–85]. Six PIPKI $\gamma$  splice isoforms have been detected with distinct subcellular localisations and functions [86–90]. In some contexts, such as at the non-ciliated centriole, PIPKI $\gamma$  isoform i3 operates via a kinase-independent, scaffold-dependent mechanism [78]. In several cell lines PIPKI $\gamma$  depletion arrests ciliogenesis and reduces cilia length in cells that do form cilia, in a kinase-dependent manner, although this study did

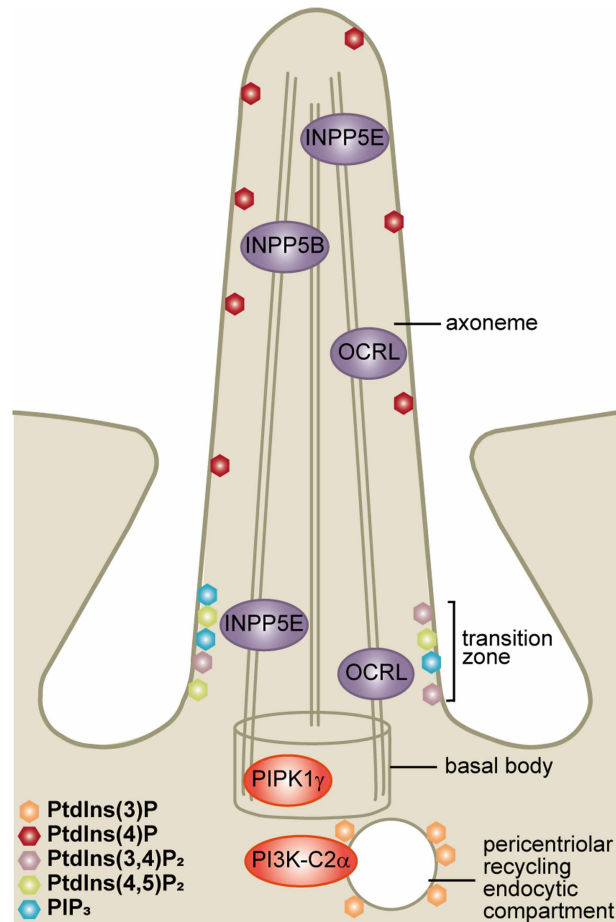

**Figure 5. Phosphoinositide map at primary cilia.**

The phosphoinositides localise to discrete subcompartments of the ciliary membrane. PtdIns(4)P is the major phosphoinositide in the ciliary membrane. The transition zone membrane at the cilia base is a ‘hot-spot’ enriched for multiple phosphoinositides including PtdIns(4,5)P<sub>2</sub>, PIP<sub>3</sub> and PtdIns(3,4)P<sub>2</sub>. PtdIns(3)P is associated with the pericentriolar recycling endocytic compartment. The phosphoinositide regulatory enzymes PI3K-C2α, PIPK1γ, INPP5E, OCRL and INPP5B also localise to specific ciliary subdomains in proximity to their substrates and products.

not examine whether a single or multiple isoforms contribute to this function [10]. Furthermore, deletion of the sole Type Iγ PtdIns(4)P 5-kinase homologue in *Caenorhabditis elegans* results in defective cilia function [10]. Three mouse models that are null for *Pip5k1c* (which encodes PIPK1γ) have been reported [91–93]. Mice homozygous for a gene trap allele in which the first 32 PIPK1γ amino acids are fused to β-Gal are embryonically lethal with defective neural tube closure, a ciliopathy phenotype, although ciliogenesis and cilia function have not been examined in this model [91]. In contrast, the other murine *Pip5k1c* knockout (KO) models survive to birth and die as neonates, with no evidence of a ciliopathy phenotype [92,93]. The reasons for the distinct phenotypes in these models remain unknown [91–93]

### Regulation of ciliary phosphoinositides by inositol PI 5-phosphatases

In mammals, the inositol polyphosphate 5-phosphatases are a family of ten members that play non-redundant roles in cell biology, with three members, INPP5E, OCRL and INPP5B having established functions at cilia by acting as major regulators of their substrates PtdIns(4,5)P<sub>2</sub> and PIP<sub>3</sub> at this site [4–6,94,95]. This review will focus on these cilia-associated phosphatases. An additional 5-phosphatase, SHIP2, has also been shown to regulate cilia formation and length but not via direct regulation of ciliary phosphoinositides [96] and will therefore not be discussed here.



**Table 1** Cilia associated PI regulatory enzymes, their localisation at cilia and cilia associated substrates and products

| Class        | Enzyme           | Substrate                                     | Product                                 | Cilia Localisation                               | References |
|--------------|------------------|-----------------------------------------------|-----------------------------------------|--------------------------------------------------|------------|
| Kinases      | PI3K-C2 $\alpha$ | PtdIns                                        | PtdIns(3)P                              | Pericentriolar recycling endocytic compartment   | [9]        |
|              | PIPKI $\gamma$   | PtdIns(4)P                                    | PtdIns(4,5)P <sub>2</sub>               | Centrosome                                       | [10]       |
| Phosphatases | INPP5E           | PtdIns(4,5)P <sub>2</sub><br>PIP <sub>3</sub> | PtdIns(4)P<br>PtdIns(3,4)P <sub>2</sub> | Cilia axoneme<br>Transition zone (in some cells) | [6,11,12]  |
|              | OCRL             | PtdIns(4,5)P <sub>2</sub><br>PIP <sub>3</sub> | PtdIns(4)P<br>PtdIns(3,4)P <sub>2</sub> | Cilia axoneme<br>Cilium base                     | [77,107]   |
|              | INPP5B           | PtdIns(4,5)P <sub>2</sub><br>PIP <sub>3</sub> | PtdIns(4)P<br>PtdIns(3,4)P <sub>2</sub> | Cilia axoneme                                    | [119]      |

### INPP5E

INPP5E hydrolyses the 5-phosphate from PtdIns(4,5)P<sub>2</sub> and PIP<sub>3</sub> with the greatest activity towards the latter lipid *in vitro* [97,98] and localises to the cilia axoneme, transition zone (Figure 5) and the Golgi [6,11,12,98].

INPP5E mutations cause two human ciliopathy syndromes, namely Joubert syndrome (OMIM #213300) and MORM (mental retardation, obesity, congenital retinal dystrophy and micropenis in males; OMIM #610156) [11,12].

Joubert syndrome is an autosomal recessive disorder defined by a mid-brain malformation (the ‘molar tooth sign’) and associated with mental retardation, retinal degeneration, apnea and cystic kidneys [12,99,100]. Loss-of-function mutations in more than 30 genes have been identified in Joubert syndrome to date. INPP5E Joubert syndrome mutations cluster in or around the 5-phosphatase domain and the mutant proteins assayed show reduced *in vitro* 5-phosphatase activity towards both PtdIns(4,5)P<sub>2</sub> and PIP<sub>3</sub> [12,101].

INPP5E is the only gene known to be mutated in MORM, a rare congenital disorder that resembles other ciliopathy syndromes and has been identified in a consanguineous family [11]. The MORM mutation results in deletion of the 18 C-terminal amino acids of INPP5E including the CAAX motif, which is important for ciliary membrane localisation, but does not affect 5-phosphatase activity [11].

In experimental model systems such as zebrafish, knockdown of *inpp5e* induces pronephric cysts, microphthalmia, pericardial edema and kinked tail phenotypes, characteristic of cilia dysfunction and associated with reduced ciliated cells and cilia length in the Kupffer’s vesicle and pronephric ducts [102]. *Inpp5e* KO mice are embryonically lethal with a classical ciliopathy phenotype including exencephaly, anophthalmia, polydactyly, polycystic kidneys, pulmonary hypoplasia, cleft palate, oedema and ossification delays [6,11]. Renal-specific *Inpp5e* deletion results in severe polycystic kidneys and renal failure with morbidity by postnatal day 21 [103,104]. *Inpp5e*-null cells exhibit reduced cilia stability [11] and consistent with multiple aspects of the phenotype, a diminished *in vitro* and *in vivo* Hedgehog pathway response [4–7]. Significantly, expression of a constitutively active Smoothed mutant in the context of *Inpp5e* deletion during embryonic development dramatically rescues anophthalmia and exencephaly and partially rescues the oedema, cleft palate and polydactyly, indicating that these *Inpp5e*-null phenotypes are caused by repressed Hedgehog signalling [6].

### OCRL

OCRL hydrolyses PtdIns(4,5)P<sub>2</sub>, PIP<sub>3</sub> and PtdIns(3,5)P<sub>2</sub>, with the greatest activity towards PtdIns(4,5)P<sub>2</sub> [105,106]. OCRL localises to the base of the cilium, the axoneme (Figure 5) and the endocytic network (the Golgi, early endosomes, clathrin coated vesicles and autolysosomes) [77,107–111]. While OCRL has a well-established role in endocytic trafficking and actin cytoskeletal regulation (reviewed in [111]), its role at cilia and in regulation of ciliary phosphoinositides is just beginning to emerge [77,95,107,112]. OCRL is mutated in oculocerebrorenal syndrome of Lowe (Lowe syndrome) (OMIM #309000) [76] and Dent 2 disease (OMIM #300555) [113]. All disease-associated mutations are loss-of-function and reduce its PtdIns(4,5)P<sub>2</sub> 5-phosphatase activity, with the level of residual protein and severity of the cell biological defects appearing to differentiate the more severe Lowe syndrome from the relatively mild, largely renal-specific, Dent 2 disease [113–115].

Lowe syndrome subjects exhibit Fanconi syndrome (low-molecular-weight proteinuria, aminoaciduria and hypercalciuria), mental retardation, maladaptive behaviour and congenital cataracts. Lowe syndrome does not completely phenocopy a true ciliopathy syndrome but exhibits some key similarities and is therefore suggested

to be a ciliopathy-associated disease [112,116]. Evidence supporting Lowe syndrome as a ciliopathy includes the involvement of the same major organs (brain, kidney and eye), overlapping phenotypes (cataracts, hypotonia and polyuria) and the presence of defects in length, assembly/disassembly and function of cilia in mutant and KO/knockdown cells [77,107,112,115]. Furthermore, *ocr1* knockdown zebrafish are lethal with ciliopathy phenotypes including defective body-axis asymmetry and curvature, pericardial oedema, hydrocephalus, microphthalmia, microlentis and pronephric cysts [77,107,112]. Interestingly, *Ocr1* deletion in mice has no phenotypic effects due to compensation by the *Ocr1* homologue *Inpp5b*, with *Ocr1;Inpp5b* double KO mice exhibiting embryonic lethality [117]. Reconstitution of *Ocr1;Inpp5b* double KO mice with human *INPP5B* rescued lethality but still resulted in a Lowe syndrome-like phenotype including aminoaciduria, proteinuria and growth retardation, indicating lack of full functional conservation between mouse and human *INPP5B* [118].

## INPP5B

Similar to its closely related homologue OCRL, INPP5B also contributes to regulation of ciliary phosphoinositides [117,119]. INPP5B localises to the cis-Golgi, the endoplasmic reticulum-to-Golgi intermediate compartment, endosomes, phagosomes and the primary cilium (Figure 5) and hydrolyses PtdIns(4,5)P<sub>2</sub> and PIP<sub>3</sub> [119–124]. Depletion of *INPP5B* reduces ciliated cell number and cilia length [119]. *inpp5b* knockdown zebrafish also exhibit a ciliopathy phenotype consisting of microphthalmia, kinked tail and body axis asymmetry defects [119]. The molecular mechanisms by which INPP5B regulates cilia biology have been little characterised to date.

## Ciliary phosphoinositide map

The ciliary membrane is continuous with the plasma membrane, however, it is becoming increasingly clear that it exhibits a distinct phosphoinositide composition [4–8]. How the different ciliary lipid membrane domains are established and maintained remains incompletely understood but this may relate to the specific localisation of ciliary lipid kinases and/or phosphatases such as PI3K-C2α [9], PIPKIγ [10], INPP5E [11], OCRL [77,107] and INPP5B [119] (Figure 5 and Table 1), or the presence of a physical diffusion barrier [125,126]. In support of a membrane diffusion barrier, glycosylphosphatidylinositol-tagged yellow fluorescent reporter proteins targeted to the apical membrane of epithelial cells are excluded from cilia [125]. Furthermore, in *Caenorhabditis elegans* mutation of the transition zone component *mks5* resulting in defective barrier function allows PtdIns(4,5)P<sub>2</sub> to abnormally accumulate along the length of the cilium [126].

PtdIns(4,5)P<sub>2</sub>, PtdIns(4)P, PIP<sub>3</sub> and PtdIns(3,4)P<sub>2</sub> localise to specific sub-regions of the cilia membrane, with PtdIns(3)P found at the cilia-associated pericentriolar recycling endocytic compartment (Figure 5 and Table 2) [4–9,95,126].

PtdIns(4,5)P<sub>2</sub> is the most extensively studied ciliary phosphoinositide in a range of species and cell types [4–8,95,126]. The majority of studies conclude that PtdIns(4,5)P<sub>2</sub> is concentrated at the ciliary base, however, subtle differences have been described [4–8,95,126]. Indeed, some reports contend that PtdIns(4,5)P<sub>2</sub> localises to the proximal end of the cilium [5] or the base [8,126], whereas other studies show it colocalises with

**Table 2 Localisation and function of phosphoinositides at primary cilia**

| Cilia compartment                              | Phosphoinositides         | Proposed function                                | References |
|------------------------------------------------|---------------------------|--------------------------------------------------|------------|
| Centriole (in non-ciliated cells)              | PtdIns(4)P                | inhibition of ciliogenesis                       | [10]       |
| Pericentriolar recycling endocytic compartment | PtdIns(3)P                | Rab8 activation, ciliogenesis, cilia trafficking | [9]        |
| Ciliary membrane                               | PtdIns(4)P                | Unknown                                          | [4,5]      |
|                                                | PtdIns(4,5)P <sub>2</sub> | recruitment of TULP3 and GPCR trafficking        | [4,5]      |
|                                                |                           | actin polymerisation and cilia decapitation      | [29]       |
| Transition zone                                | PIP <sub>3</sub>          | transition zone integrity and barrier function   | [6]        |
|                                                | PtdIns(4,5)P <sub>2</sub> | cilia stability/disassembly                      | [7]        |
|                                                | PtdIns(3,4)P <sub>2</sub> | transition zone integrity and barrier function   | [6]        |
|                                                | PtdIns(3,4)P <sub>2</sub> | Unknown                                          | [7]        |

transition zone markers [6,7,95] and one study suggested enrichment at the cilia tip but only following deletion of INPP5E [4]. These differences may relate to species or cell types used, but are most likely due to technical differences in the phosphoinositide detection methods used (Box 1). Although, a common interpretation from these studies is that PtdIns(4,5)P<sub>2</sub> is depleted at the ciliary membrane relative to the plasma membrane, consistent with the essential role multiple 5-phosphatases play in cilia biology [4–8,95,126].

The localisation of the other phosphoinositides is less contentious, possibly due to the fact that they have been examined in less studies to date. PIP<sub>3</sub> and PtdIns(3,4)P<sub>2</sub> localise to the transition zone [6,7], with PtdIns(4)P being continuous along the cilia membrane [4,5,95] and PtdIns(3)P at the pericentriolar recycling endocytic compartment at the cilia base (Figure 5 and Table 2) [9]. Given the differences in PtdIns(4,5)P<sub>2</sub> localisation between studies and that relatively fewer groups have assessed the other ciliary phosphoinositides it is likely that all species will benefit from a more comprehensive multi-approach analysis to confirm their localisations.

## Phosphoinositides and their functions in ciliary subcompartments

Below, we will explore each of the ciliary subcompartments (centrosome, pericentriolar recycling endocytic compartment, ciliary membrane and transition zone), describing which phosphoinositides localise to these

### Box 1: Influence of phosphoinositide detection methods on apparent cilia localisation

PtdIns(4,5)P<sub>2</sub> is the best studied ciliary phosphoinositide, with its cilia localisation reported to vary slightly between studies, ranging from the transition zone, proximal end, cilia base and one study showing localisation to the proximal end of the cilium in *Inpp5e*-null cells [4–8,95,126]. These differences in reported distributions likely result from the different phosphoinositide detection methods that were used in each study.

Expression of fluorescently-labelled phosphoinositide binding biosensors, such as the PtdIns(4,5)P<sub>2</sub>-binding PH domain of phospholipase C $\delta$ , have been a mainstay of phosphoinositide detection for many years [180]. These tools are limited however by the potential off-target effects resulting from lipid sequestration by directly competing with endogenous lipid binding proteins and preventing the access of lipid-metabolising enzymes [180]. Furthermore, the biosensors may not report an accurate localisation if their access to the lipid is restricted by a diffusion barrier or entrapment by proximal lipid pools [181].

Immunofluorescence using phosphoinositide specific monoclonal antibodies can overcome these issues, but the staining pattern observed is highly dependent on the cell permeabilisation method used, as lipids are not cross-linked during fixation and are liable to extraction [182]. PtdIns(4,5)P<sub>2</sub> was observed at the transition zone using either digitonin-permeabilisation optimised for detection of intracellular membrane phosphoinositides or methanol permeabilisation [6,7,182]. In contrast, Triton X-100 permeabilises endomembranes [183] and studies using this permeabilisation method detected ciliary membrane PtdIns(4,5)P<sub>2</sub> only following lipid 5-phosphatase depletion [4,95].

Therefore, although a consensus seems to exist supporting PtdIns(4,5)P<sub>2</sub>-enrichment at the cilia base, further studies using multiple methods of validation, co-localisation with cilia sub-compartment markers, superresolution and live cell imaging will be required to precisely elucidate its localisation.

Notably, many of the protocols used to detect ciliary phosphoinositides are incompatible with plasma membrane phosphoinositide staining, meaning that even though PtdIns(4,5)P<sub>2</sub> is abundant at the plasma membrane, studies directly comparing ciliary and plasma membrane phosphoinositide pools have not been possible [4,6,7,95,182].

sites, examine their functions in cilia biology and highlight outstanding questions. Table 2 provides a summary of this section.

### The centrosome: in non-ciliated cells centrosomal PtdIns(4)P inhibits ciliogenesis and is removed to licence transition zone formation and axoneme elongation

During ciliogenesis the mother centriole docks with the plasma membrane [127] (Figure 3(iii)) where the microtubule capping protein CP110 must be removed from the distal end of the centriole to enable transition zone formation and axoneme elongation [128,129]. CP110 is removed from the mother centriole by tau-tubulin kinase-2 (TTBK2), which itself is recruited to the centriole by the distal appendage protein CEP164 [130,131]. Both TTBK2 and CEP164 contain phosphoinositide binding sites that interact with PtdIns(4)P, with lipid binding disrupting the TTBK2/CEP164 complex [10].

Notably, in non-ciliated cells PtdIns(4)P localises to the centrosome and is removed by phosphorylation upon serum starvation and the induction of ciliogenesis [10]. Therefore centrosomal PtdIns(4)P is proposed to inhibit local CEP164-mediated TTBK2 recruitment and thereby suppress cilia formation in non-ciliated conditions [10]. Upon serum starvation, PtdIns(4)P is phosphorylated at the centrosome to PtdIns(4,5)P<sub>2</sub>, enabling CEP164 to recruit TTBK2, promoting removal of CEP110 from the distal centriole and licensing the cell competent for ciliogenesis [10].

Centrosomal PtdIns(4)P levels are tightly regulated by the opposing actions of PIPKI $\gamma$  and INPP5E [10]. PIPKI $\gamma$  localises to the mother centriole in ciliated cells where it is proposed to deplete the levels of PtdIns(4)P by phosphorylating it to PtdIns(4,5)P<sub>2</sub>, whereas INPP5E is observed at the centriole only in non-ciliated cells to produce PtdIns(4)P and thereby inhibit ciliogenesis [10]. INPP5E then moves into the axoneme once the cell assembles the cilium, thereby depleting PtdIns(4)P levels at the centrosome [10,12]. Indeed, PIPKI $\gamma$  depletion and INPP5E overexpression, both of which are expected to increase local PtdIns(4)P, suppress ciliogenesis and in PIPKI $\gamma$  knockdown cells ciliogenesis was halted between the centriole docking and transition zone formation steps [10].

### Unanswered questions

The antibodies and siRNAs used in the studies above recognise all PIPKI $\gamma$  splice isoforms and the authors do not state which isoform was used to generate the overexpression plasmids, therefore it is unknown whether one or more isoforms contribute to ciliogenesis [10]. Similarities between the phenotype of one of the *Pip5k1c* (encoding PIPKI $\gamma$ ) KO models and ciliopathies supports the contention that PIPKI $\gamma$  is required for ciliogenesis, whereas the two other *Pip5k1c* KO models reported do not show ciliopathy phenotypes, raising questions on how to interpret these mouse phenotypes [91–93].

This lipid interconversion model also appears inconsistent with the phenotype of *Inpp5e*-null mice and the numerous studies showing that INPP5E is required for cilia maintenance [4–7,11,12,29,102,132]. Perhaps, INPP5E negatively regulates the initial stages of ciliogenesis but then stabilises pre-established cilia. The fact that the *Inpp5e*-null phenotype is characteristic of a cilia loss-of-function model may suggest INPP5E's predominant role is to stabilise cilia/enable normal cilia function and the loss of ciliated cells following ectopic INPP5E expression *in vitro* may be an overexpression artefact.

An intriguing question is the precise localisation of this PtdIns(4)P pool. The centrosome is a non-membranous protein structure. It could be hypothesised that the PtdIns(4)P may bind to lipid transfer proteins at this site or that PtdIns(4)P-decorated vesicles associate with the centrosome.

### Pericentriolar recycling endocytic compartment: local PtdIns(3)P controls cilia length and subcellular trafficking of cilia proteins

A specific pool of PtdIns(3)P is produced by PI3K-C2 $\alpha$  at the pericentriolar recycling endocytic compartment, a Rab11-positive endosomal structure at the base of the cilium (Figure 5) [9]. Multiple Rab GTPases including Rab11, Rab8 and its guanine nucleotide exchange factor (GEF) Rabin8 are essential for protein entry into the cilium and cilia lengthening. Rab11 promotes Rabin8 GEF activity and thereby stimulates Rab8 activation [133–136]. PtdIns(3)P recruits and activates Rab11 at the pericentriolar recycling endocytic compartment and promotes Rab8 accumulation at cilia [9]. Depletion of this PtdIns(3)P pool by *Pik3c2a* deletion or knockdown reduces cilia length and impairs the trafficking of transmembrane proteins SMO and polycystin-2 into cilia

[9,73]. Importantly, PI3K-C2 $\alpha$  generates both PtdIns(3)P and PtdIns(3,4)P<sub>2</sub> but only the production of PtdIns(3)P is required for Rab11 recruitment and thereby regulation of this cilia trafficking pathway [9].

The importance of the cilia-associated PtdIns(3)P pool is highlighted by the ciliopathy phenotype and repressed cilia signalling of ubiquitous and renal-specific *Pik3c2a* KO mouse models [9,73]. These phenotypes are consistent with the impaired Smoothened and polycystin-2 cilia trafficking [9,73]. Furthermore, fibroblasts from subjects with the novel *PIK3C2A* mutant ciliopathy-like syndrome exhibit shorter cilia with reduced PtdIns(3)P and Rab11 levels at the cilia base [75]. In renal epithelial cells this cilia base endosomal PtdIns(3)P pool is increased by shear stress in a PI3K-C2 $\alpha$ -dependent manner to recruit autophagy mediators and thereby activates a non-canonical shear stress-induced autophagy program [137].

## Unanswered questions

There are many outstanding questions regarding the pericentriolar recycling endocytic compartment. This includes whether (1) this indeed constitutes a separate subcellular compartment, distinct from the conventional recycling endosome; (2) why incoming cargo appears to not directly traffic from the Golgi or recycling endosomes into the cilium and (3) whether a specific type of carrier needs to be formed in order to allow entry into the cilium.

## The ciliary membrane: a local PtdIns(4)P/PtdIns(4,5)P<sub>2</sub> balance controls receptor recruitment to cilia

PtdIns(4)P localises along the ciliary membrane, with little or no PtdIns(4,5)P<sub>2</sub> localising to this site (Figure 5) [4,5,95]. However, loss of *INPP5E* in neural stem cells and MEFs depletes the ciliary membrane PtdIns(4)P pool and induces a dramatic accumulation of PtdIns(4,5)P<sub>2</sub>, suggesting the major pathway for PtdIns(4)P production is via dephosphorylation of PtdIns(4,5)P<sub>2</sub> at the 5-position [4,5,95]. Indeed, PIPKI $\gamma$  is enriched at the base of the cilium where it could produce PtdIns(4,5)P<sub>2</sub> [4]. A similar phenotype of PtdIns(4)P loss and PtdIns(4,5)P<sub>2</sub> build-up at the cilium is observed in fibroblasts from human Lowe syndrome subjects and in MEFs from the human *INPP5B* reconstituted *Ocr1;Inpp5b* co-deletion Lowe syndrome mouse model [95].

In contrast with the centrosomal PtdIns(4)P pool, the role of PtdIns(4)P at the ciliary membrane is yet to be uncovered, although it is possible that this lipid may not have a specific function in this compartment and may simply be the degradation product remaining from PtdIns(4,5)P<sub>2</sub> hydrolysis. However, the aberrant accumulation of PtdIns(4,5)P<sub>2</sub> at the cilia membrane has a major impact on cilia signalling and stability and is proposed to contribute to the ciliopathy phenotypes observed with *INPP5E* mutation or deletion [4,5,29].

In both neural stem cells and MEFs, *Inpp5e* deletion leads to PtdIns(4,5)P<sub>2</sub> accumulation at the ciliary membrane [4,5]. The phosphoinositide binding protein Tubby-like protein 3 (TULP3) acts as a molecular bridge linking ciliary membrane proteins to the IFT machinery, thereby enabling protein localisation to primary cilia, a function dependent on the phosphoinositide binding domain of TULP3 [138,139]. TULP3 binds to PtdIns(4,5)P<sub>2</sub>, PIP<sub>3</sub> and PtdIns(3,4)P<sub>2</sub> via its Tubby domain [139,140]. Ciliary TULP3 levels are increased in *Inpp5e* KO cells suggesting increased ciliary PtdIns(4,5)P<sub>2</sub> induces TULP3 accumulation [4,5]. Significantly, GPR161 is a TULP3 cargo and an important negative regulator of Hedgehog signalling (Figure 4A(iii)) [36]. Like TULP3, GPR161 aberrantly accumulates in *Inpp5e*-null cilia in the absence and presence of Hedgehog pathway stimulation, which directs internalisation in wild-type cells [4,5,36]. Therefore accumulation of PtdIns(4,5)P<sub>2</sub> in cilia following *Inpp5e* deletion is proposed to recruit elevated levels of the TULP3/GPR161 complex to cilia and thereby repress Hedgehog signalling (Figure 6) [4,5]. Regulation of Hedgehog signalling via this model could contribute to the Hedgehog-dependent phenotypes observed in *Inpp5e*-null embryos [6,11].

Primary cilia disassembly is induced in cell culture by serum or growth factor stimulation as cells re-enter the cell cycle [21]. Following serum stimulation, *INPP5E* exits the cilium creating a situation similar to *Inpp5e*-null cells which are hypersensitive to disassembly stimuli [11,29]. As serum stimulation removes *INPP5E* from cilia, PtdIns(4,5)P<sub>2</sub> is no longer hydrolysed and accumulates [29]. Outside the cilium PtdIns(4,5)P<sub>2</sub> is well-established to promote actin polymerisation (reviewed in [141]). Cilia are normally devoid of actin, however, following serum stimulation actin polymerises at the site of maximal PtdIns(4,5)P<sub>2</sub> signals and mediates an event termed cilia decapitation, whereby the cilia tip buds off and is released from the cell (Figure 3(iv)) [29]. Ciliary components are released in these vesicles and the process promotes cilia disassembly and cell cycle re-entry [29].

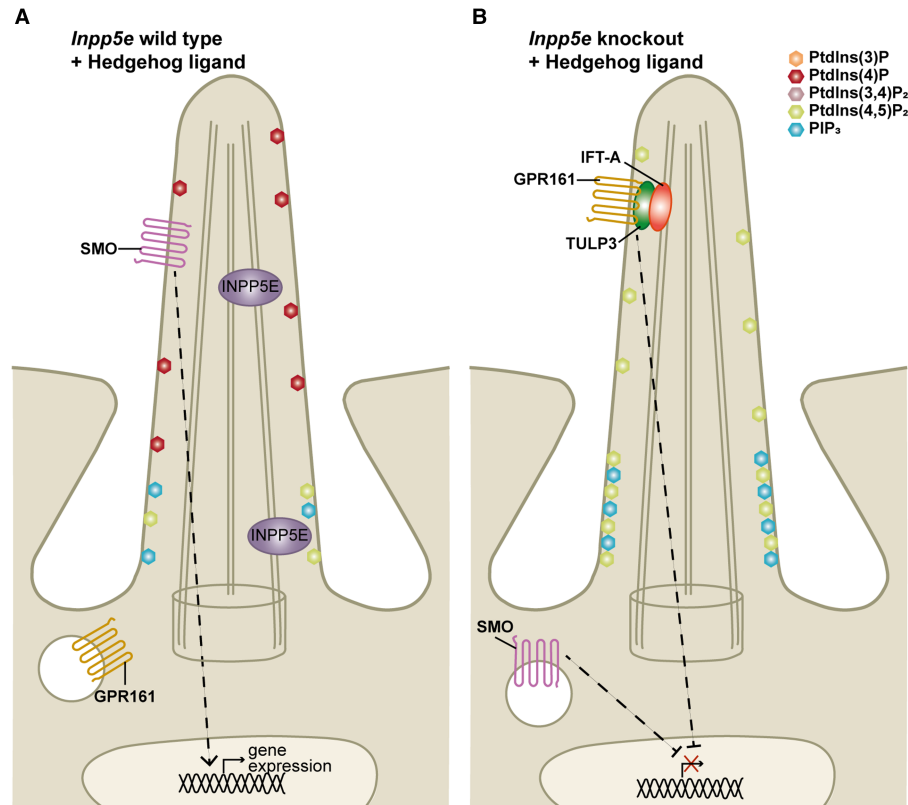

**Figure 6. INPP5E regulates Hedgehog signalling via ciliary phosphoinositide metabolism.**

(A) INPP5E localises to the cilia axoneme and transition zone. In the axoneme INPP5E prevents the accumulation of PtdIns(4,5)P<sub>2</sub> via hydrolysis to PtdIns(4)P. At the transition zone INPP5E regulates the local PtdIns(4,5)P<sub>2</sub> and PtdIns(3,4,5)P<sub>3</sub> levels. Upon Hedgehog stimulation of wild type cells SMO accumulates at the cilium promoting ciliary exit of the negative regulator GPR161 and subsequently Hedgehog target gene expression. (B) In the axoneme of *Inpp5e* knockout cilia PtdIns(4,5)P<sub>2</sub> accumulates. TULP3 binds the increased ciliary PtdIns(4,5)P<sub>2</sub> inducing GPR161 accumulation even in the presence of Hedgehog ligand stimulation. PtdIns(4,5)P<sub>2</sub> and PIP<sub>3</sub> accumulate in the *Inpp5e*-null transition zone upon Hedgehog pathway activation which is associated with disruption of the transition zone complexes and compromised diffusion barrier retention function. Therefore SMO fails to concentrate in *Inpp5e*-null cilia. These events contribute to a reduced transcriptional response to Hedgehog stimulation.

### Unanswered questions

TULP3 not only binds PtdIns(4,5)P<sub>2</sub>, but has also been reported to interact with PIP<sub>3</sub> and PtdIns(3,4)P<sub>2</sub> [139]. Given that both of these lipids localise to the transition zone, the potential role of PIP<sub>3</sub> and PtdIns(3,4)P<sub>2</sub> in TULP3 and its target recruitment to cilia is an interesting question to consider [6,7]. Furthermore, cilia decapitation, sometimes also referred to as ectocytosis, removes GPCRs from the cilium thereby regulating cilia signalling [142]. Similar to decapitation-induced cell cycle re-entry, this process is actin-dependent suggesting a similar molecular mechanism [29,142]. However, a role for phosphoinositides such as PtdIns(4,5)P<sub>2</sub> in this process has not been examined.

### The transition zone

The transition zone membrane is a phosphoinositide enrichment ‘hot-spot’ (Figure 5). At this site phosphoinositides are principally regulated by phosphorylation/dephosphorylation of the phosphate at the 5-position of the inositol ring. In the following sections we describe the important functions of the transition zone-associated phosphoinositides [PtdIns(4,5)P<sub>2</sub>, PIP<sub>3</sub> and PtdIns(3,4)P<sub>2</sub>] and their regulation. The transition zone is the only cilia subdomain so far to be associated with PIP<sub>3</sub> and PtdIns(3,4)P<sub>2</sub>, the products of class I PI3K signalling [6,7].

## Transition zone PtdIns(4,5)P<sub>2</sub> and PIP<sub>3</sub> respond to Hedgehog signalling and regulate diffusion barrier function

Discrete pools of PtdIns(4,5)P<sub>2</sub> and PIP<sub>3</sub> localise to the cilia transition zone in MEFs, granule cell progenitor (GCP)-like tumour cells and hTERT-retinal pigment epithelial 1 cells where they co-localise with the transition zone component TCTN1 and regulate transition zone function (Figure 5) [6,7]. Transition zone PtdIns(4,5)P<sub>2</sub> and PIP<sub>3</sub> are dynamically regulated by Hedgehog signalling. Hedgehog pathway stimulation of MEFs using the small molecule SMO activator SAG (SMO agonist) decreases transition zone PtdIns(4,5)P<sub>2</sub> levels and increases PIP<sub>3</sub> [6], possibly as PtdIns(4,5)P<sub>2</sub> is phosphorylated at the 3-position by an unknown class I PI3K.

INPP5E localises to the transition zone in a subset of cells and tightly controls the local levels of the transition zone phosphoinositides, essential for transition zone barrier function and thereby Hedgehog signalling [6]. In SAG-treated *Inpp5e*-null MEFs the transition zone levels of both PtdIns(4,5)P<sub>2</sub> and PIP<sub>3</sub> are elevated relative to SAG-treated wild-type MEFs (Figure 6) [6]. Under these conditions of aberrantly high transition zone PtdIns(4,5)P<sub>2</sub>/PIP<sub>3</sub> in SAG-treated *Inpp5e*-null MEFs, specific defects in transition zone composition were uncovered with functional implications that could explain aspects of the *INPP5E* mutant phenotype. This includes a failure of the transition zone proteins MKS1, TCTN1, TMEM231 and B9D1 to correctly localise to this compartment [6]. Another group of proteins that are affected by *Inpp5e* deletion are septins, a family that form diffusion barriers in cells in general, including at the cilia base where they are proposed to contribute to localisation of transition zone components and retention of receptors in the cilium [19,143,144]. SEPT2 is a septin family member that localises to the axoneme and cilia base [144] and its levels were reduced at the ciliary base in SAG-treated *Inpp5e* KO MEFs [6]. Many transition zone proteins contain C2 and B9 domains [20] and SEPT2 interacts with phosphoinositides including PtdIns(4,5)P<sub>2</sub> and PIP<sub>3</sub> via a polybasic region [145], suggesting SEPT2 and transition zone protein mislocalisation in SAG-treated *Inpp5e*-null MEFs may directly relate to the aberrant transition zone phosphoinositide composition.

The reduced recruitment of the ciliary receptors SMO, polycystin II and HTR6 to SAG-treated *Inpp5e*-null cilia is reflective of defective transition zone barrier function [6]. However, given that the non-ciliary protein CEACAM-1 was still excluded from the axoneme, mechanisms governing ciliary entry appear to remain intact. To assess cilia retention, fluorescence recovery after photobleaching of GFP-tagged SMO was examined in *Inpp5e*-null cells. An increased turnover of ciliary GFP-SMO under these conditions revealed that the ciliary retention mechanisms of the transition zone are indeed compromised [6].

An inability of SMO to accumulate in the SAG-stimulated *Inpp5e*-null cilium could explain the abnormal localisation of downstream Hedgehog pathway components in these cells. Firstly, GLI2 concentrates at the cilia tip for SMO-dependent activation [38], but this response was blunted in *Inpp5e* KO cells [6]. Secondly, SMO localisation to the cilium promotes GPR161 cilia exit [146], therefore reduced ciliary SMO could be the cause of increased ciliary GRP161 levels in *Inpp5e*-null cells [4–6]. Therefore, defective ciliary retention mechanisms and the inability of SMO to accumulate in the cilia membrane resulting from abnormal transition zone phosphoinositide composition are likely to contribute to the Hedgehog-dependent phenotypes and repressed Hedgehog signalling in *Inpp5e* KO embryos and cells (Figure 6) [4–6].

Similarly, SAG-stimulated ciliary SMO localisation was blunted in Lowe syndrome murine model fibroblasts, which exhibit elevated transition zone PtdIns(4,5)P<sub>2</sub> levels [95]. OCRL also hydrolyses PIP<sub>3</sub> but its levels have not been assessed in these cells, therefore disruption of transition zone PtdIns(4,5)P<sub>2</sub> and PIP<sub>3</sub> could contribute to SMO mislocalisation in this context.

In *Drosophila* chordotonal neurons, the INPP5E homologue dINPP5E localises to the cilia base most likely the transition zone, in a region surrounded by high PtdIns(4,5)P<sub>2</sub> levels [8]. Consistent with murine cells [4–6], *dInpp5e* mutation or knockdown leads to increased PtdIns(4,5)P<sub>2</sub> levels at this site, associated with increased dTULP cilia recruitment and mislocalisation of the receptors Inactive and NOMPC to the proximal end of the cilium [8]. As an alternative approach to elevate transition zone PtdIns(4,5)P<sub>2</sub>, the PtdIns(4)P-5-kinase Skittles was ectopically expressed in these *Drosophila* neurons resulting in a similar phenotype [8]. Notably, inactivating mutation of *Skittles* in the *Drosophila* male germline induced cilia with abnormally elongated transition zones and functional abnormalities such as defective transition zone plasma membrane tethering [147]. Although this study did not assess the effect of *Skittles* mutation on the transition zone PtdIns(4,5)P<sub>2</sub> levels, a previous study showed ectopic Skittles controls this phosphoinositide pool [8], suggesting that transition zone PtdIns(4,5)P<sub>2</sub> signals are essential for transition zone maturation and normal ciliogenesis [147].

### Transition zone PIP<sub>3</sub> activates a local signalling axis to control cilia assembly/stability

Primary cilia are in a constant dynamic equilibrium between assembly and disassembly [148–151]. In addition to the involvement of INPP5E, OCRL and INPP5B in cilia assembly and stability [7,11,12,29,77,102,107,115,119,132], there is also indirect evidence to implicate class I PI3K signalling in these phenomena.

Class I PI3Ks phosphorylate PtdIns(4,5)P<sub>2</sub> to generate PIP<sub>3</sub> at the plasma membrane in response to stimulation of RTKs or GPCRs [55]. PIP<sub>3</sub> and its dephosphorylation product PtdIns(3,4)P<sub>2</sub> act as second messengers by recruiting and activating PH domain-containing proteins [63]. The serine/threonine kinase AKT is one of the most well studied PIP<sub>3</sub>/PtdIns(3,4)P<sub>2</sub> effector proteins, which, following PIP<sub>3</sub>/PtdIns(3,4)P<sub>2</sub>-driven recruitment to the plasma membrane, becomes fully activated by PDK1- and mTORC2-mediated phosphorylation [152]. The following observations suggest ciliary PIP<sub>3</sub> and class I PI3Ks may contribute to the mechanisms controlling cilia dynamics (Figure 7).

1. Depletion of the PTEN phosphatase which converts PIP<sub>3</sub> to PtdIns(4,5)P<sub>2</sub> and directly opposes PI3K signalling [153], reduces cilia stability, although this is proposed to at least in part rely on the protein phosphatase activity of PTEN [154].
2. Activation of RTKs such as PDGFR upstream of class I PI3K induces cilia disassembly, which is rescued by inhibition of PI3K or AKT [7,11,155–157].
3. Overexpression of wild-type or constitutively active AKT suppresses cilia assembly [7]. AKT and its downstream target GSK3β localise to primary cilia [66,158]. In its non-phosphorylated active form, GSK3β promotes cilia assembly and stability [159,160] and is inhibited via AKT-mediated phosphorylation [161].

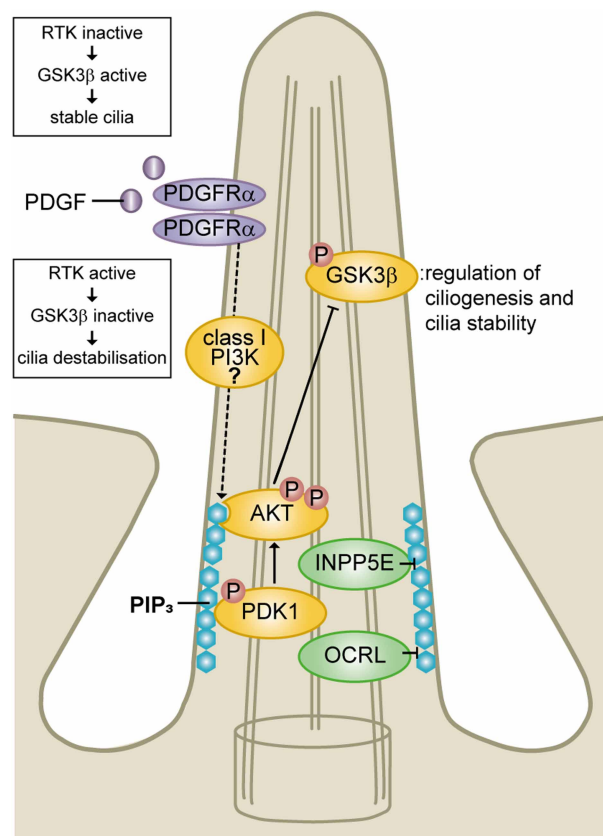

**Figure 7. Regulation of cilia stability by transition zone PIP<sub>3</sub>.**

PIP<sub>3</sub> localises to the transition zone and its levels increase following stimulation by growth factors possibly via an unknown class I PI3K. Increased transition zone PIP<sub>3</sub> activates a localised AKT signalling axis which inactivates GSK3β contributing to reduced cilia stability. Local PIP<sub>3</sub> is negatively regulated by the cilia-localised PI 5-phosphatases INPP5E and OCRL.



4. Providing more direct evidence that ciliary PIP<sub>3</sub> regulates the cilia assembly/disassembly balance, this lipid localises to the transition zone, with its levels increasing following disassembly-inducing growth factor stimulation [6,7].
5. Other evidence for a role of ciliary PIP<sub>3</sub> in cilia assembly/disassembly comes from a cilia- and Hedgehog-dependent form of the brain tumour medulloblastoma [162,163]. *Inpp5e*-null Hedgehog-activated murine medulloblastoma cells exhibit reduced cilia assembly *in vivo* and *in vitro*, with increased transition zone PIP<sub>3</sub> levels in cells isolated from this model. This is associated with increased localisation of activated phospho(p)S241-PDK1 and pT308-AKT to the cilia base and elevated phosphorylated/inhibited pS9-GSK3β recruitment to the axoneme [7]. However, no changes in the pathway were observed at the whole cell level [7]. Although INPP5E-mediated PIP<sub>3</sub> hydrolysis produces PtdIns(3,4)P<sub>2</sub> which is also capable of recruiting AKT, many studies have shown loss of 5-phosphatase family members including INPP5E activate AKT signalling via PIP<sub>3</sub> accumulation [103,164–172]. The number of ciliated *Inpp5e*-null Hedgehog-dependent medulloblastoma cells was rescued by pan-PI3K inhibition and wild-type (but not catalytically inactive) INPP5E [7]. Pan-PI3K inhibition also rescued the increased ciliary PIP<sub>3</sub> levels in these *Inpp5e* KO cells, collectively suggesting cilia-specific PIP<sub>3</sub> signalling to AKT and thereby GSK3β inhibition may be an important regulatory mechanism controlling cilia dynamics in medulloblastoma [7].
6. Joubert syndrome and Lowe syndrome patient cells with *INPP5E* and *OCRL* mutations, some of which have been shown to reduce PIP<sub>3</sub> 5-phosphatase activity, exhibit reduced cilia stability and assembly respectively [12,77,115], suggesting the ciliary PIP<sub>3</sub>/AKT/GSK3β axis may play a role in these diseases, but this is yet to be directly tested.
7. mTORC1 signals downstream of PIP<sub>3</sub>/AKT and has been suggested to positively and negatively regulate ciliogenesis indirectly via modulation of autophagy [173]. However, multiple signalling pathways feed into mTORC1 and it has not been shown that mTORC1 activity is regulated by ciliary phosphoinositides.

### Transition zone PtdIns(3,4)P<sub>2</sub> function is relatively unexplored

PtdIns(3,4)P<sub>2</sub> localises to the transition zone, however, its function, significance and metabolism at this site are largely unknown [7]. Transition zone PtdIns(3,4)P<sub>2</sub> may be produced by 3-position phosphorylation of PtdIns(4)P by a cilia-associated PI3K such as PI3K-C2α or potentially via 5-phosphatase hydrolysis of PIP<sub>3</sub> [7,9]. Indeed a subtle reduction in PtdIns(3,4)P<sub>2</sub> transition zone intensity was observed following *Inpp5e* deletion in medulloblastoma cells [7].

The BBSome is a multi-protein complex that forms a coat on membranes to sort and facilitate entry of membrane proteins into the ciliary membrane [174]. In the cilia model organism *Trypanosoma brucei* the BBSome localises to the transition zone [175]. In humans, mutations in BBSome components cause the ciliopathy BBS characterised by obesity, blindness, polydactyly and mental retardation [176]. The BBSome is recruited onto membranes by the GTPase ARL6 (also known as BBS3) [174]. The BBSome component BBS5 is also thought to bind directly to membranes [133]. BBS5 contains two phosphoinositide binding PH domains that were shown in lipid overlay studies to preferentially bind PtdIns(3)P, but also interact with PtdIns(3,4)P<sub>2</sub>, PtdIns(3,5)P<sub>2</sub>, PtdIns(4)P and PtdIns(5)P [133]. In a slightly more physiologically relevant assay, the recruitment of the BBSome onto liposomes by ARL6 was enhanced by the inclusion of phosphoinositides in the liposomes and most dramatically by PtdIns(3,4)P<sub>2</sub> [174]. Given that PtdIns(3,4)P<sub>2</sub> and the BBSome localise to the transition zone [7,175], these data suggest the BBSome may be recruited to the transition zone via a BBS5-PtdIns(3,4)P<sub>2</sub> interaction *en route* to deliver its cargo membrane proteins into the ciliary membrane. The difference in phosphoinositide binding specificity between liposome and lipid overlay assays may result from a change in lipid binding specificity when lipids are presented immobilised on a membrane *versus* in a lipid bilayer [174].

However, recent structural studies have raised doubts about this model. Firstly, the phosphoinositide binding sites are not conserved in the BBS5 PH domains and the putative phosphoinositide binding pockets are occluded by another BBSome component in the 3D-structure of the complex [177]. Therefore, if these BBS5 sites were to bind PtdIns(3,4)P<sub>2</sub> or any other phosphoinositide, the complex would need to undergo an unknown conformational change to expose the critical residues [177]. Secondly, a purified BBSome lacking BBS5 (containing only BBS4, BBS8, BBS9 and BBS18) bound the same phosphoinositides [PtdIns(3)P, PtdIns(3,5)P<sub>2</sub>, PtdIns(4,5)P<sub>2</sub>, PtdIns(5)P and PtdIns(3,4)P<sub>2</sub>] in lipid overlay assays as BBS5 alone and the BBSome containing BBS5, indicating that at least *in vitro* other BBSome components are also capable of phosphoinositide binding [178].

## Unanswered questions

One of the most important questions in the context of the ciliary transition zone is which enzyme produces PIP<sub>3</sub> and PtdIns(3,4)P<sub>2</sub> in this location. It seems reasonable to hypothesise that (a) class I PI3K(s) phosphorylates PtdIns(4,5)P<sub>2</sub> at the transition zone for local PIP<sub>3</sub> production. However, all studies to date have used pan-PI3K inhibitors [7,11]. Moreover, it is unknown whether class I PI3Ks enzymes localise to cilia or whether the lipid is transported from elsewhere. Technical limitations make it difficult to determine the precise subcellular localisation of endogenous and recombinant class I PI3Ks [179]. Furthermore, it is possible that different class I PI3K isoforms contribute to the transition zone PIP<sub>3</sub> pool under basal and growth factor stimulated conditions. Conversely, the contribution of cilia biology to the function of class I PI3K(s) remain unknown.

PtdIns(3,4)P<sub>2</sub> is produced by both class II PI3K phosphorylation of PtdIns(4)P and by 5-phosphatase hydrolysis of PIP<sub>3</sub> and it is unknown which of these is the major pathway required for transition zone PtdIns(3,4)P<sub>2</sub> production.

It is also unclear precisely how PtdIns(4,5)P<sub>2</sub> and PIP<sub>3</sub> function to regulate transition zone composition and how disease-related changes in the levels of these lipids lead to mislocalisation of transition zone components and diffusion barrier dysfunction. Similar to *Inpp5e*-null cells, fibroblasts from the Lowe syndrome mouse model exhibit reduced SAG-stimulated SMO ciliary localisation [95]. The functional significance of these observations is unclear given that Lowe syndrome does not present with typical Hedgehog loss-of-function phenotypes and that *OCRL* mutant or KO cells have not been shown to exhibit a defective Hedgehog transcriptional response [105,106].

## Conclusions and perspectives

Significant progress has been made in understanding the phosphoinositide composition of the primary cilium and the function of these lipids at cilia. It is becoming increasingly clear that ciliary phosphoinositides are critical regulators of multiple processes covering the entire cilia life cycle, from the initiation of ciliogenesis and ciliary trafficking to disassembly. An emerging theme, also common to non-ciliary phosphoinositides, is that the same lipid exhibits distinct functions at different ciliary subdomains, likely depending on the local phosphoinositide-binding effectors.

All studies to date have utilised phosphoinositide-binding biosensors or monoclonal antibodies for lipid detection at the cilium [4–9,29]. As detailed in Box 1, these techniques have limitations and some caution needs to be exercised in interpreting the reported subcellular localisation of these phosphoinositides and a combination of detection methods and specificity validation is required.

Despite the recent advances described here, many unanswered questions remain regarding ciliary phosphoinositide function and metabolism. Key outstanding questions include addressing how the cilium maintains its unique phosphoinositide complement, is this via the action of local lipid kinases and phosphatases or is it largely controlled by diffusion barriers? Are all phosphoinositides produced locally at cilia or trafficked from an endocytic compartment or the plasma membrane into the ciliary membrane and if they are produced locally, what is the source of non-phosphorylated PtdIns?

Ultimately the most important question is how to harness the growing understanding of ciliary phosphoinositides to design treatments for ciliopathy syndromes caused by defective phosphoinositide metabolism at cilia. The high druggability of the enzymes regulating phosphoinositide metabolism, currently mainly exploited in the context of cancer and immune regulation, may also offer opportunities to alleviate suffering in ciliopathy syndromes.

## Competing Interests

B.V. is a consultant for Karus Therapeutics (Oxford, U.K.), iOnctura (Geneva, Switzerland) and Venthera (Palo Alto, CA, U.S.A.) and has received speaker fees from Gilead (Foster City, U.S.A.). S.E.C. declares no conflict of interest.

## Funding

S.E.C. is supported by an EU Marie Skłodowska-Curie fellowship (contract number 838559). Work in the laboratory of B.V. is supported by PTEN Research, Cancer Research UK (C23338/A25722) and the UK Biotechnology and Biological Sciences Research Council (BB/I007806/1, BB/M013278/1 and BB/R017972/1).

## Open Access

Open access for this article was enabled by the participation of University College London in an all-inclusive *Read & Publish* pilot with Portland Press and the Biochemical Society under a transformative agreement with JISC.

## Author Contributions

S.E.C. wrote the manuscript. S.E.C. and B.V. reviewed and edited the manuscript.

## Acknowledgements

The authors thank York Posor (Cell Signalling Laboratory, University College London, London, United Kingdom) for excellent feedback on the manuscript. S.E.C. thanks Christina A. Mitchell (Monash University, Melbourne, Australia) for the opportunity to study cilia biology in her laboratory.

## Abbreviations

BBS, Bardet–Biedl syndrome; E10.5, embryonic day 10.5; GCP, granule cell progenitor; GEF, guanine nucleotide exchange factor; GPCR, G protein-coupled receptor; IFT, intraflagellar transport; KO, knockout; MEF, mouse embryonic fibroblast; MORM, mental retardation, obesity, congenital retinal dystrophy and micropenis in males; p, Phospho; PDGFR, Platelet-Derived Growth Factor-Receptor; PH, Pleckstrin Homology; PI3K, phosphoinositide 3-kinase; PIP<sub>3</sub>, Phosphatidylinositol (3,4,5)-trisphosphate; PIPK<sub>Iγ</sub>, Type Iγ PtdIns(4)P 5-kinase; PTCH1, Patched 1; PtdIns, phosphatidylinositol; PtdIns(3)P, Phosphatidylinositol 3-phosphate; PtdIns(3,4)P<sub>2</sub>, Phosphatidylinositol 3,4-bisphosphate; PtdIns(3,4,5)P<sub>3</sub>, Phosphatidylinositol (3,4,5)-trisphosphate; PtdIns(3,5)P<sub>2</sub>, Phosphatidylinositol 3,5-bisphosphate; PtdIns(4)P, Phosphatidylinositol 4-phosphate; PtdIns(4,5)P<sub>2</sub>, Phosphatidylinositol 4,5-bisphosphate; RTK, receptor tyrosine kinase; SAG, SMO agonist; SMO, Smoothened; SUFU, Suppressor of fused; TTBK2, tau-tubulin kinase-2; TULP3, Tubby-like protein 3

## References

- 1 Balla, T. (2013) Phosphoinositides: tiny lipids with giant impact on cell regulation. *Physiol. Rev.* **93**, 1019–1137 <https://doi.org/10.1152/physrev.00028.2012>
- 2 Schink, K.O., Tan, K.W. and Stenmark, H. (2016) Phosphoinositides in control of membrane dynamics. *Annu. Rev. Cell Dev. Biol.* **32**, 143–171 <https://doi.org/10.1146/annurev-cellbio-111315-125349>
- 3 Wallroth, A. and Haucke, V. (2018) Phosphoinositide conversion in endocytosis and the endolysosomal system. *J. Biol. Chem.* **293**, 1526–1535 <https://doi.org/10.1074/jbc.R117.000629>
- 4 Chavez, M., Ena, S., Van Sande, J., de Kerchove d'Exaerde, A., Schurmans, S. and Schiffmann, S.N. (2015) Modulation of ciliary phosphoinositide content regulates trafficking and Sonic Hedgehog signaling output. *Dev. Cell* **34**, 338–350 <https://doi.org/10.1016/j.devcel.2015.06.016>
- 5 Garcia-Gonzalo, F.R., Phua, S.C., Roberson, E.C., Garcia, III, G., Abedin, M., Schurmans, S. et al. (2015) Phosphoinositides regulate ciliary protein trafficking to modulate Hedgehog signaling. *Dev. Cell* **34**, 400–409 <https://doi.org/10.1016/j.devcel.2015.08.001>
- 6 Dyson, J.M., Conduit, S.E., Feeney, S.J., Hakim, S., DiTommaso, T., Fulcher, A.J. et al. (2017) INPP5E regulates phosphoinositide-dependent cilia transition zone function. *J. Cell Biol.* **216**, 247–263 <https://doi.org/10.1083/jcb.201511055>
- 7 Conduit, S.E., Ramaswamy, V., Remke, M., Watkins, D.N., Wainwright, B.J., Taylor, M.D. et al. (2017) A compartmentalized phosphoinositide signaling axis at cilia is regulated by INPP5E to maintain cilia and promote Sonic Hedgehog medulloblastoma. *Oncogene* **36**, 5969–5984 <https://doi.org/10.1038/onc.2017.208>
- 8 Park, J., Lee, N., Kavoussi, A., Seo, J.T., Kim, C.H. and Moon, S.J. (2015) Ciliary phosphoinositide regulates ciliary protein trafficking in Drosophila. *Cell Rep.* **13**, 2808–2816 <https://doi.org/10.1016/j.celrep.2015.12.009>
- 9 Franco, I., Gulluni, F., Campa, C.C., Costa, C., Margaria, J.P., Ciralo, E. et al. (2014) PI3K class II alpha controls spatially restricted endosomal PtdIns3P and Rab11 activation to promote primary cilium function. *Dev. Cell* **28**, 647–658 <https://doi.org/10.1016/j.devcel.2014.01.022>
- 10 Xu, Q., Zhang, Y., Wei, Q., Huang, Y., Hu, J. and Ling, K. (2016) Phosphatidylinositol phosphate kinase PIPKγ and phosphatase INPP5E coordinate initiation of ciliogenesis. *Nat. Commun.* **7**, 10777 <https://doi.org/10.1038/ncomms10777>
- 11 Jacoby, M., Cox, J.J., Gayral, S., Hampshire, D.J., Ayub, M., Blockmans, M. et al. (2009) INPP5E mutations cause primary cilium signaling defects, ciliary instability and ciliopathies in human and mouse. *Nat. Genet.* **41**, 1027–1031 <https://doi.org/10.1038/ng.427>
- 12 Bielas, S.L., Silhavy, J.L., Brancati, F., Kisseleva, M.V., Al-Gazali, L., Sztriha, L. et al. (2009) Mutations in INPP5E, encoding inositol polyphosphate-5-phosphatase E, link phosphatidylinositol signaling to the ciliopathies. *Nat. Genet.* **41**, 1032–1036 <https://doi.org/10.1038/ng.423>
- 13 Bilanges, B., Posor, Y. and Vanhaesebroeck, B. (2019) PI3K isoforms in cell signalling and vesicle trafficking. *Nat. Rev. Mol. Cell Biol.* **20**, 515–534 <https://doi.org/10.1038/s41580-019-0129-z>
- 14 Pemberton, J.G., Kim, Y.J. and Balla, T. (2020) Integrated regulation of the phosphatidylinositol cycle and phosphoinositide-driven lipid transport at ER-PM contact sites. *Traffic* **21**, 200–219 <https://doi.org/10.1111/tra.12709>
- 15 Hammond, G.R.V. and Burke, J.E. (2020) Novel roles of phosphoinositides in signaling, lipid transport, and disease. *Curr. Opin. Cell Biol.* **63**, 57–67 <https://doi.org/10.1016/j.cob.2019.12.007>
- 16 Bangs, F. and Anderson, K.V. (2017) Primary cilia and mammalian Hedgehog signaling. *Cold Spring Harb. Perspect. Biol.* **9**, a028175 <https://doi.org/10.1101/cshperspect.a028175>
- 17 Goncalves, J. and Pelletier, L. (2017) The ciliary transition zone: finding the pieces and assembling the gate. *Mol. Cells* **40**, 243–253 <https://doi.org/10.14348/molcells.2017.0054>
- 18 Chih, B., Liu, P., Chinn, Y., Chalouni, C., Komuves, L.G., Hass, P.E. et al. (2011) A ciliopathy complex at the transition zone protects the cilia as a privileged membrane domain. *Nat. Cell Biol.* **14**, 61–72 <https://doi.org/10.1038/ncb2410>
- 19 Garcia-Gonzalo, F.R., Corbit, K.C., Sirerol-Piquer, M.S., Ramaswami, G., Otto, E.A., Noriega, T.R. et al. (2011) A transition zone complex regulates mammalian ciliogenesis and ciliary membrane composition. *Nat. Genet.* **43**, 776–784 <https://doi.org/10.1038/ng.891>

- 20 Garcia-Gonzalo, F.R. and Reiter, J.F. (2012) Scoring a backstage pass: mechanisms of ciliogenesis and ciliary access. *J. Cell Biol.* **197**, 697–709 <https://doi.org/10.1083/jcb.201111146>
- 21 Plotnikova, O.V., Pugacheva, E.N. and Golemis, E.A. (2009) Primary cilia and the cell cycle. *Methods Cell Biol.* **94**, 137–160 [https://doi.org/10.1016/S0091-679X\(08\)94007-3](https://doi.org/10.1016/S0091-679X(08)94007-3)
- 22 Wang, L. and Dynlacht, B.D. (2018) The regulation of cilium assembly and disassembly in development and disease. *Development* **145**, dev151407 <https://doi.org/10.1242/dev.151407>
- 23 Sorokin, S. (1962) Centrioles and the formation of rudimentary cilia by fibroblasts and smooth muscle cells. *J. Cell Biol.* **15**, 363–377 <https://doi.org/10.1083/jcb.15.2.363>
- 24 Lu, Q., Insinna, C., Ott, C., Stauffer, J., Pintado, P.A., Rahajeng, J. et al. (2015) Early steps in primary cilium assembly require EHD1/EHD3-dependent ciliary vesicle formation. *Nat. Cell Biol.* **17**, 228–240 <https://doi.org/10.1038/ncb3109>
- 25 Insinna, C., Lu, Q., Teixeira, I., Harned, A., Semler, E.M., Stauffer, J. et al. (2019) Investigation of F-BAR domain PACSIN proteins uncovers membrane tubulation function in cilia assembly and transport. *Nat. Commun.* **10**, 428 <https://doi.org/10.1038/s41467-018-08192-9>
- 26 Ishikawa, H. and Marshall, W.F. (2017) Intraflagellar transport and ciliary dynamics. *Cold Spring Harb. Perspect. Biol.* **9**, a021998 <https://doi.org/10.1101/cshperspect.a021998>
- 27 Pugacheva, E.N., Jablonski, S.A., Hartman, T.R., Henske, E.P. and Golemis, E.A. (2007) HEF1-dependent aurora A activation induces disassembly of the primary cilium. *Cell* **129**, 1351–1363 <https://doi.org/10.1016/j.cell.2007.04.035>
- 28 Plotnikova, O.V., Nikonova, A.S., Loskutov, Y.V., Kozyulina, P.Y., Pugacheva, E.N. and Golemis, E.A. (2012) Calmodulin activation of Aurora-A kinase (AURKA) is required during ciliary disassembly and in mitosis. *Mol. Biol. Cell* **23**, 2658–2670 <https://doi.org/10.1091/mbc.e11-12-1056>
- 29 Phua, S.C., Chiba, S., Suzuki, M., Su, E., Roberson, E.C., Pusapati, G.V. et al. (2017) Dynamic remodeling of membrane composition drives cell cycle through primary cilia excision. *Cell* **168**, 264–279.e15 <https://doi.org/10.1016/j.cell.2016.12.032>
- 30 Whewey, G. and Mitchison, H.M. (2019) Opportunities and challenges for molecular understanding of ciliopathies-The 100,000 genomes project. *Front. Genet.* **10**, 127 <https://doi.org/10.3389/fgene.2019.00127>
- 31 Goetz, S.C. and Anderson, K.V. (2010) The primary cilium: a signalling centre during vertebrate development. *Nat. Rev. Genet.* **11**, 331–344 <https://doi.org/10.1038/nrg2774>
- 32 Huangfu, D., Liu, A., Rakeem, A.S., Murcia, N.S., Niswander, L. and Anderson, K.V. (2003) Hedgehog signalling in the mouse requires intraflagellar transport proteins. *Nature* **426**, 83–87 <https://doi.org/10.1038/nature02061>
- 33 Schneider, L., Clement, C.A., Teilmann, S.C., Pazour, G.J., Hoffmann, E.K., Satir, P. et al. (2005) PDGFRalpha signaling is regulated through the primary cilium in fibroblasts. *Curr. Biol.* **15**, 1861–1866 <https://doi.org/10.1016/j.cub.2005.09.012>
- 34 Corbit, K.C., Shyer, A.E., Dowdle, W.E., Gaulden, J., Singla, V., Chen, M.H. et al. (2008) Kif3a constrains beta-catenin-dependent Wnt signalling through dual ciliary and non-ciliary mechanisms. *Nat. Cell Biol.* **10**, 70–76 <https://doi.org/10.1038/ncb1670>
- 35 Simons, M., Gloy, J., Ganner, A., Bullerkotte, A., Bashkurov, M., Kronig, C. et al. (2005) Inversin, the gene product mutated in nephronophthisis type II, functions as a molecular switch between Wnt signaling pathways. *Nat. Genet.* **37**, 537–543 <https://doi.org/10.1038/ng1552>
- 36 Mukhopadhyay, S., Wen, X., Ratti, N., Loktev, A., Rangell, L., Scales, S.J. et al. (2013) The ciliary G-protein-coupled receptor Gpr161 negatively regulates the Sonic Hedgehog pathway via cAMP signaling. *Cell* **152**, 210–223 <https://doi.org/10.1016/j.cell.2012.12.026>
- 37 Wang, B., Fallon, J.F. and Beachy, P.A. (2000) Hedgehog-regulated processing of Gli3 produces an anterior/posterior repressor gradient in the developing vertebrate limb. *Cell* **100**, 423–434 [https://doi.org/10.1016/S0092-8674\(00\)80678-9](https://doi.org/10.1016/S0092-8674(00)80678-9)
- 38 Kim, J., Kato, M. and Beachy, P.A. (2009) Gli2 trafficking links Hedgehog-dependent activation of Smoothened in the primary cilium to transcriptional activation in the nucleus. *Proc. Natl Acad. Sci. U.S.A.* **106**, 21666–21671 <https://doi.org/10.1073/pnas.0912180106>
- 39 Ding, Q., Motoyama, J., Gasca, S., Mo, R., Sasaki, H., Rossant, J. et al. (1998) Diminished Sonic Hedgehog signaling and lack of floor plate differentiation in Gli2 mutant mice. *Development* **125**, 2533–2543 PMID:9636069
- 40 Rohatgi, R., Milenkovic, L. and Scott, M.P. (2007) Patched1 regulates Hedgehog signaling at the primary cilium. *Science* **317**, 372–376 <https://doi.org/10.1126/science.1139740>
- 41 Myers, B.R., Neahring, L., Zhang, Y., Roberts, K.J. and Beachy, P.A. (2017) Rapid, direct activity assays for Smoothened reveal Hedgehog pathway regulation by membrane cholesterol and extracellular sodium. *Proc. Natl Acad. Sci. U.S.A.* **114**, E11141–e11150 <https://doi.org/10.1073/pnas.1717891115>
- 42 Kogerman, P., Grimm, T., Kogerman, L., Krause, D., Uden, A.B., Sandstedt, B. et al. (1999) Mammalian suppressor-of-fused modulates nuclear-cytoplasmic shuttling of Gli-1. *Nat. Cell Biol.* **1**, 312–319 <https://doi.org/10.1038/13031>
- 43 Corbit, K.C., Aanstad, P., Singla, V., Norman, A.R., Stainier, D.Y. and Reiter, J.F. (2005) Vertebrate Smoothened functions at the primary cilium. *Nature* **437**, 1018–1021 <https://doi.org/10.1038/nature04117>
- 44 Deneff, N., Neubuser, D., Perez, L. and Cohen, S.M. (2000) Hedgehog induces opposite changes in turnover and subcellular localization of Patched and Smoothened. *Cell* **102**, 521–531 [https://doi.org/10.1016/S0092-8674\(00\)00056-8](https://doi.org/10.1016/S0092-8674(00)00056-8)
- 45 Eichberger, T., Sander, V., Schnidar, H., Regl, G., Kasper, M., Schmid, C. et al. (2006) Overlapping and distinct transcriptional regulator properties of the GLI1 and GLI2 oncogenes. *Genomics* **87**, 616–632 <https://doi.org/10.1016/j.ygeno.2005.12.003>
- 46 Carballo, G.B., Honorato, J.R., de Lopes, G.P.F. and Spohr, T. (2018) A highlight on Sonic Hedgehog pathway. *Cell Commun. Signal.* **16**, 11 <https://doi.org/10.1186/s12964-018-0220-7>
- 47 Huangfu, D. and Anderson, K.V. (2005) Cilia and Hedgehog responsiveness in the mouse. *Proc. Natl Acad. Sci. U.S.A.* **102**, 11325–11330 <https://doi.org/10.1073/pnas.0505328102>
- 48 Liu, A., Wang, B. and Niswander, L.A. (2005) Mouse intraflagellar transport proteins regulate both the activator and repressor functions of Gli transcription factors. *Development* **132**, 3103–3111 <https://doi.org/10.1242/dev.01894>
- 49 May, S.R., Ashique, A.M., Karlen, M., Wang, B., Shen, Y., Zarbalis, K. et al. (2005) Loss of the retrograde motor for IFT disrupts localization of Smo to cilia and prevents the expression of both activator and repressor functions of Gli. *Dev. Biol.* **287**, 378–389 <https://doi.org/10.1016/j.ydbio.2005.08.050>
- 50 Litingtung, Y., Dahm, R.D., Li, Y., Fallon, J.F. and Chiang, C. (2002) Shh and Gli3 are dispensable for limb skeleton formation but regulate digit number and identity. *Nature* **418**, 979–983 <https://doi.org/10.1038/nature01033>
- 51 Vanhaesebroeck, B., Leever, S.J., Ahmadi, K., Timms, J., Katso, R., Driscoll, P.C. et al. (2001) Synthesis and function of 3-phosphorylated inositol lipids. *Annu. Rev. Biochem.* **70**, 535–602 <https://doi.org/10.1146/annurev.biochem.70.1.535>

- 52 Varnai, P. and Balla, T. (1998) Visualization of phosphoinositides that bind pleckstrin homology domains: calcium- and agonist-induced dynamic changes and relationship to myo-[3H]inositol-labeled phosphoinositide pools. *J. Cell Biol.* **143**, 501–510 <https://doi.org/10.1083/jcb.143.2.501>
- 53 Lassing, I. and Lindberg, U. (1985) Specific interaction between phosphatidylinositol 4,5-bisphosphate and profilactin. *Nature* **314**, 472–474 <https://doi.org/10.1038/314472a0>
- 54 Cremona, O., Di Paolo, G., Wenk, M.R., Luthi, A., Kim, W.T., Takei, K. et al. (1999) Essential role of phosphoinositide metabolism in synaptic vesicle recycling. *Cell* **99**, 179–188 [https://doi.org/10.1016/S0092-8674\(00\)81649-9](https://doi.org/10.1016/S0092-8674(00)81649-9)
- 55 Hawkins, P.T., Jackson, T.R. and Stephens, L.R. (1992) Platelet-derived growth factor stimulates synthesis of PtdIns(3,4,5)P<sub>3</sub> by activating a PtdIns(4,5)P<sub>2</sub> 3-OH kinase. *Nature* **358**, 157–159 <https://doi.org/10.1038/358157a0>
- 56 Ojala, P.J., Paavilainen, V. and Lappalainen, P. (2001) Identification of yeast cofilin residues specific for actin monomer and PIP<sub>2</sub> binding. *Biochemistry* **40**, 15562–15569 <https://doi.org/10.1021/bi0117697>
- 57 Berridge, M.J. and Irvine, R.F. (1989) Inositol phosphates and cell signalling. *Nature* **341**, 197–205 <https://doi.org/10.1038/341197a0>
- 58 Wang, Y.J., Wang, J., Sun, H.Q., Martinez, M., Sun, Y.X., Macia, E. et al. (2003) Phosphatidylinositol 4 phosphate regulates targeting of clathrin adaptor AP-1 complexes to the Golgi. *Cell* **114**, 299–310 [https://doi.org/10.1016/S0092-8674\(03\)00603-2](https://doi.org/10.1016/S0092-8674(03)00603-2)
- 59 Gillooly, D.J., Morrow, I.C., Lindsay, M., Gould, R., Bryant, N.J., Gaullier, J.M. et al. (2000) Localization of phosphatidylinositol 3-phosphate in yeast and mammalian cells. *EMBO J.* **19**, 4577–4588 <https://doi.org/10.1093/emboj/19.17.4577>
- 60 Lemmon, M.A. (2007) Pleckstrin homology (PH) domains and phosphoinositides. *Biochem. Soc. Symp.* **74**, 81–93 <https://doi.org/10.1042/BSS0740081>
- 61 Lenoir, M., Kufareva, I., Abagyan, R. and Overduin, M. (2015) Membrane and protein interactions of the Pleckstrin Homology domain superfamily. *Membranes (Basel)* **5**, 646–663 <https://doi.org/10.3390/membranes5040646>
- 62 Godi, A., Di Campli, A., Konstantakopoulos, A., Di Tullio, G., Alessi, D.R., Kular, G.S. et al. (2004) FAPPs control Golgi-to-cell-surface membrane traffic by binding to ARF and PtdIns(4)P. *Nat. Cell Biol.* **6**, 393–404 <https://doi.org/10.1038/ncb1119>
- 63 Frech, M., Andjelkovic, M., Ingley, E., Reddy, K.K., Falck, J.R. and Hemmings, B.A. (1997) High affinity binding of inositol phosphates and phosphoinositides to the pleckstrin homology domain of RAC/protein kinase B and their influence on kinase activity. *J. Biol. Chem.* **272**, 8474–8481 <https://doi.org/10.1074/jbc.272.13.8474>
- 64 Stephens, L., Anderson, K., Stokoe, D., Erdjument-Bromage, H., Painter, G.F., Holmes, A.B. et al. (1998) Protein kinase B kinases that mediate phosphatidylinositol 3,4,5-trisphosphate-dependent activation of protein kinase B. *Science* **279**, 710–714 <https://doi.org/10.1126/science.279.5351.710>
- 65 Heras-Martínez, G.L., Calleja, V., Bailly, R., Dessolin, J., Larijani, B. and Requejo-Isidro, J. (2019) A complex interplay of anionic phospholipid binding regulates 3'-phosphoinositide-dependent-kinase-1 homodimer activation. *Sci. Rep.* **9**, 14527 <https://doi.org/10.1038/s41598-019-50742-8>
- 66 Higginbotham, H., Guo, J., Yokota, Y., Umberger, N.L., Su, C.Y., Li, J. et al. (2013) Arl13b-regulated cilia activities are essential for polarized radial glial scaffold formation. *Nat. Neurosci.* **16**, 1000–1007 <https://doi.org/10.1038/nn.3451>
- 67 Stahelin, R.V. (2009) Lipid binding domains: more than simple lipid effectors. *J. Lipid Res.* **50**, S299–S304 <https://doi.org/10.1194/jlr.R800078-JLR200>
- 68 Sutton, R.B., Davletov, B.A., Berghuis, A.M., Sudhof, T.C. and Sprang, S.R. (1995) Structure of the first C2 domain of synaptotagmin I: a novel Ca<sup>2+</sup>/phospholipid-binding fold. *Cell* **80**, 929–938 [https://doi.org/10.1016/0092-8674\(95\)90296-1](https://doi.org/10.1016/0092-8674(95)90296-1)
- 69 Remans, K., Burger, M., Vetter, I.R. and Wittinghofer, A. (2014) C2 domains as protein-protein interaction modules in the ciliary transition zone. *Cell Rep.* **8**, 1–9 <https://doi.org/10.1016/j.celrep.2014.05.049>
- 70 Dowdle, W.E., Robinson, J.F., Kneist, A., Sierrol-Piquer, M.S., Frints, S.G., Corbit, K.C. et al. (2011) Disruption of a ciliary B9 protein complex causes meckel syndrome. *Am. J. Hum. Genet.* **89**, 94–110 <https://doi.org/10.1016/j.ajhg.2011.06.003>
- 71 Ho, L.K., Liu, D., Rozycka, M., Brown, R.A. and Fry, M.J. (1997) Identification of four novel human phosphoinositide 3-kinases defines a multi-isoform subfamily. *Biochem. Biophys. Res. Commun.* **235**, 130–137 <https://doi.org/10.1006/bbrc.1997.6747>
- 72 Posor, Y., Eichhorn-Gruenig, M., Puchkov, D., Schoneberg, J., Ullrich, A., Lampe, A. et al. (2013) Spatiotemporal control of endocytosis by phosphatidylinositol-3,4-bisphosphate. *Nature* **499**, 233–237 <https://doi.org/10.1038/nature12360>
- 73 Franco, I., Margaria, J.P., De Santis, M.C., Ranghino, A., Monteyne, D., Chiaravalli, M. et al. (2016) Phosphoinositide 3-Kinase-C2alpha regulates polycystin-2 ciliary entry and protects against kidney cyst formation. *J. Am. Soc. Nephrol.* **27**, 1135–1144 <https://doi.org/10.1681/ASN.2014100967>
- 74 Yoshioka, K., Yoshioka, K., Cui, H., Wakayama, T., Takuwa, N., Okamoto, Y. et al. (2012) Endothelial PI3K-C2alpha, a class II PI3K, has an essential role in angiogenesis and vascular barrier function. *Nat. Med.* **18**, 1560–1569 <https://doi.org/10.1038/nm.2928>
- 75 Tiosano, D., Baris, H.N., Chen, A., Hitzert, M.M., Schueler, M., Gulluni, F. et al. (2019) Mutations in PIK3C2A cause syndromic short stature, skeletal abnormalities, and cataracts associated with ciliary dysfunction. *PLoS Genet.* **15**, e1008088 <https://doi.org/10.1371/journal.pgen.1008088>
- 76 Attree, O., Olivos, I.M., Okabe, I., Bailey, L.C., Nelson, D.L., Lewis, R.A. et al. (1992) The Lowe's oculocerebrorenal syndrome gene encodes a protein highly homologous to inositol polyphosphate-5-phosphatase. *Nature* **358**, 239–242 <https://doi.org/10.1038/358239a0>
- 77 Coon, B.G., Hernandez, V., Madhivanan, K., Mukherjee, D., Hanna, C.B., Barinaga-Rementeria Ramirez, I. et al. (2012) The Lowe syndrome protein OCLR1 is involved in primary cilia assembly. *Hum. Mol. Genet.* **21**, 1835–1847 <https://doi.org/10.1093/hmg/ddr615>
- 78 Xu, Q., Zhang, Y., Xiong, X., Huang, Y., Salisbury, J.L., Hu, J. et al. (2014) PIPKgamma targets to the centrosome and restrains centriole duplication. *J. Cell Sci.* **127**, 1293–1305 <https://doi.org/10.1242/jcs.141465>
- 79 Ling, K., Bairstow, S.F., Carbonara, C., Turbin, D.A., Huntsman, D.G. and Anderson, R.A. (2007) Type I gamma phosphatidylinositol phosphate kinase modulates adherens junction and E-cadherin trafficking via a direct interaction with mu 1B adaptin. *J. Cell Biol.* **176**, 343–353 <https://doi.org/10.1083/jcb.200606023>
- 80 Ling, K., Doughman, R.L., Firestone, A.J., Bunce, M.W. and Anderson, R.A. (2002) Type I gamma phosphatidylinositol phosphate kinase targets and regulates focal adhesions. *Nature* **420**, 89–93 <https://doi.org/10.1038/nature01082>
- 81 Di Paolo, G., Pellegrini, L., Letinic, K., Cestra, G., Zoncu, R., Voronov, S. et al. (2002) Recruitment and regulation of phosphatidylinositol phosphate kinase type 1 gamma by the FERM domain of talin. *Nature* **420**, 85–89 <https://doi.org/10.1038/nature01147>
- 82 Wang, Y.J., Li, W.H., Wang, J., Xu, K., Dong, P., Luo, X. et al. (2004) Critical role of PIP5K[gamma]87 in InsP3-mediated Ca<sup>2+</sup> signaling. *J. Cell Biol.* **167**, 1005–1010 <https://doi.org/10.1083/jcb.200408008>
- 83 Bairstow, S.F., Ling, K., Su, X., Firestone, A.J., Carbonara, C. and Anderson, R.A. (2006) Type I gamma661 phosphatidylinositol phosphate kinase directly interacts with AP2 and regulates endocytosis. *J. Biol. Chem.* **281**, 20632–20642 <https://doi.org/10.1074/jbc.M601465200>

- 84 Peng, W., Huang, W., Ge, X., Xue, L., Zhao, W. and Xue, J. (2019) Type I gamma phosphatidylinositol phosphate kinase promotes tumor growth by facilitating Warburg effect in colorectal cancer. *EBioMedicine* **44**, 375–386 <https://doi.org/10.1016/j.ebiom.2019.05.015>
- 85 Thapa, N., Choi, S., Tan, X., Wise, T. and Anderson, R.A. (2015) Phosphatidylinositol phosphate 5-kinase gamma and phosphoinositide 3-kinase/Akt signaling couple to promote oncogenic growth. *J. Biol. Chem.* **290**, 18843–18854 <https://doi.org/10.1074/jbc.M114.596742>
- 86 Giudici, M.L., Emson, P.C. and Irvine, R.F. (2004) A novel neuronal-specific splice variant of type I phosphatidylinositol 4-phosphate 5-kinase isoform gamma. *Biochem. J.* **379**, 489–496 <https://doi.org/10.1042/bj20031394>
- 87 Giudici, M.L., Lee, K., Lim, R. and Irvine, R.F. (2006) The intracellular localisation and mobility of type I gamma phosphatidylinositol 4P 5-kinase splice variants. *FEBS Lett.* **580**, 6933–6937 <https://doi.org/10.1016/j.febslet.2006.11.052>
- 88 Ishihara, H., Shibasaki, Y., Kizuki, N., Wada, T., Yazaki, Y., Asano, T. et al. (1998) Type I phosphatidylinositol-4-phosphate 5-kinases. Cloning of the third isoform and deletion/substitution analysis of members of this novel lipid kinase family. *J. Biol. Chem.* **273**, 8741–8748 <https://doi.org/10.1074/jbc.273.15.8741>
- 89 Schill, N.J. and Anderson, R.A. (2009) Two novel phosphatidylinositol-4-phosphate 5-kinase type I gamma splice variants expressed in human cells display distinctive cellular targeting. *Biochem. J.* **422**, 473–482 <https://doi.org/10.1042/BJ20090638>
- 90 Xia, Y., Irvine, R.F. and Giudici, M.L. (2011) Phosphatidylinositol 4-phosphate 5-kinase I $\gamma$ \_v6, a new splice variant found in rodents and humans. *Biochem. Biophys. Res. Commun.* **411**, 416–420 <https://doi.org/10.1016/j.bbrc.2011.06.168>
- 91 Wang, Y., Lian, L., Golden, J.A., Morrissey, E.E. and Abrams, C.S. (2007) PIP5K gamma is required for cardiovascular and neuronal development. *Proc. Natl Acad. Sci. U.S.A.* **104**, 11748–11753 <https://doi.org/10.1073/pnas.0700019104>
- 92 Legate, K.R., Montag, D., Böttcher, R.T., Takahashi, S. and Fässler, R. (2012) Comparative phenotypic analysis of the two major splice isoforms of phosphatidylinositol phosphate kinase type I $\gamma$  in vivo. *J. Cell Sci.* **125**, 5636–5646 <https://doi.org/10.1242/jcs.102145>
- 93 Di Paolo, G., Moskowitz, H.S., Gipson, K., Wenk, M.R., Voronov, S., Obayashi, M. et al. (2004) Impaired PtdIns(4,5)P<sub>2</sub> synthesis in nerve terminals produces defects in synaptic vesicle trafficking. *Nature* **431**, 415–422 <https://doi.org/10.1038/nature02896>
- 94 Hakim, S., Bertucci, M.C., Conduit, S.E., Vuong, D.L. and Mitchell, C.A. (2012) Inositol polyphosphate phosphatases in human disease. *Curr. Top. Microbiol. Immunol.* **362**, 247–314 [https://doi.org/10.1007/978-94-007-5025-8\\_12](https://doi.org/10.1007/978-94-007-5025-8_12)
- 95 Prosseda, P.P., Luo, N., Wang, B., Alvarado, J.A., Hu, Y. and Sun, Y. (2017) Loss of OCRL increases ciliary PI(4,5)P<sub>2</sub> in Lowe oculocerebrorenal syndrome. *J. Cell Sci.* **130**, 3447–3454 <https://doi.org/10.1242/jcs.200857>
- 96 Hamze-Komaihi, O., Sarr, S., Arlot-Bonnemains, Y., Samuel, D. and Gassama-Diagne, A. (2016) SHIP2 regulates lumen generation, cell division, and ciliogenesis through the control of basolateral to apical lumen localization of aurora A and HEF 1. *Cell Rep.* **17**, 2738–2752 <https://doi.org/10.1016/j.celrep.2016.11.033>
- 97 Kisseleva, M.V., Wilson, M.P. and Majerus, P.W. (2000) The isolation and characterization of a cDNA encoding phospholipid-specific inositol polyphosphate 5-phosphatase. *J. Biol. Chem.* **275**, 20110–20116 <https://doi.org/10.1074/jbc.M910119199>
- 98 Kong, A.M., Speed, C.J., O'Malley, C.J., Layton, M.J., Meehan, T., Loveland, K.L. et al. (2000) Cloning and characterization of a 72-kDa inositol-polyphosphate 5-phosphatase localized to the Golgi network. *J. Biol. Chem.* **275**, 24052–24064 <https://doi.org/10.1074/jbc.M000874200>
- 99 Maria, B.L., Hoang, K.B., Tusa, R.J., Mancuso, A.A., Hamed, L.M., Quisling, R.G. et al. (1997) “Joubert syndrome” revisited: key ocular motor signs with magnetic resonance imaging correlation. *J. Child Neurol.* **12**, 423–430 <https://doi.org/10.1177/088307389701200703>
- 100 Saar, K., Al-Gazali, L., Sztriha, L., Rueschendorf, F., Nur, E.K.M., Reis, A. et al. (1999) Homozygosity mapping in families with Joubert syndrome identifies a locus on chromosome 9q34.3 and evidence for genetic heterogeneity. *Am. J. Hum. Genet.* **65**, 1666–1671 <https://doi.org/10.1086/302655>
- 101 Travaglini, L., Brancati, F., Silhavy, J., Iannicelli, M., Nickerson, E., Elkhartoufi, N. et al. (2013) Phenotypic spectrum and prevalence of INPP5E mutations in Joubert syndrome and related disorders. *Eur. J. Hum. Genet.* **21**, 1074–1078 <https://doi.org/10.1038/ejhg.2012.305>
- 102 Luo, N., Lu, J. and Sun, Y. (2012) Evidence of a role of inositol polyphosphate 5-phosphatase INPP5E in cilia formation in zebrafish. *Vision Res.* **75**, 98–107 <https://doi.org/10.1016/j.visres.2012.09.011>
- 103 Hakim, S., Dyson, J.M., Feeney, S.J., Davies, E.M., Sriratana, A., Koenig, M.N. et al. (2016) Inpp5e suppresses polycystic kidney disease via inhibition of PI3K/Akt-dependent mTORC1 signaling. *Hum. Mol. Genet.* **25**, 2295–2313 <https://doi.org/10.1093/hmg/ddw097>
- 104 Conduit, S.E., Davies, E.M., Ooms, L.M., Gurung, R., McGrath, M.J., Hakim, S. et al. (2020) AKT signaling promotes DNA damage accumulation and proliferation in polycystic kidney disease. *Hum. Mol. Genet.* **29**, 31–48 <https://doi.org/10.1093/hmg/ddz232>
- 105 Schmid, A.C., Wise, H.M., Mitchell, C.A., Nussbaum, R. and Woscholski, R. (2004) Type II phosphoinositide 5-phosphatases have unique sensitivities towards fatty acid composition and head group phosphorylation. *FEBS Lett.* **576**, 9–13 <https://doi.org/10.1016/j.febslet.2004.08.052>
- 106 Zhang, X., Jefferson, A.B., Auethavekiat, V. and Majerus, P.W. (1995) The protein deficient in Lowe syndrome is a phosphatidylinositol-4,5-bisphosphate 5-phosphatase. *Proc. Natl Acad. Sci. U.S.A.* **92**, 4853–4856 <https://doi.org/10.1073/pnas.92.11.4853>
- 107 Luo, N., West, C.C., Murga-Zamalloa, C.A., Sun, L., Anderson, R.M., Wells, C.D. et al. (2012) OCRL localizes to the primary cilium: a new role for cilia in Lowe syndrome. *Hum. Mol. Genet.* **21**, 3333–3344 <https://doi.org/10.1093/hmg/ddz163>
- 108 Olivos-Glander, I.M., Janne, P.A. and Nussbaum, R.L. (1995) The oculocerebrorenal syndrome gene product is a 105-kD protein localized to the Golgi complex. *Am. J. Hum. Genet.* **57**, 817–823 PMID:7573041
- 109 Suchy, S.F., Olivos-Glander, I.M. and Nussbaum, R.L. (1995) Lowe syndrome, a deficiency of phosphatidylinositol 4,5-bisphosphate 5-phosphatase in the Golgi apparatus. *Hum. Mol. Genet.* **4**, 2245–2250 <https://doi.org/10.1093/hmg/4.12.2245>
- 110 Erdmann, K.S., Mao, Y., McCrea, H.J., Zoncu, R., Lee, S., Paradise, S. et al. (2007) A role of the Lowe syndrome protein OCRL in early steps of the endocytic pathway. *Dev. Cell* **13**, 377–390 <https://doi.org/10.1016/j.devcel.2007.08.004>
- 111 De Matteis, M.A., Staiano, L., Emma, F. and Devuyst, O. (2017) The 5-phosphatase OCRL in Lowe syndrome and dent disease 2. *Nat. Rev. Nephrol.* **13**, 455–470 <https://doi.org/10.1038/nrneph.2017.83>
- 112 Rbaibi, Y., Cui, S., Mo, D., Carattino, M., Rohatgi, R., Satlin, L.M. et al. (2012) OCRL1 modulates cilia length in renal epithelial cells. *Traffic* **13**, 1295–1305 <https://doi.org/10.1111/j.1600-0854.2012.01387.x>
- 113 Shrimpton, A.E., Hoopes, Jr, R.R., Knohl, S.J., Hueber, P., Reed, A.A., Christie, P.T. et al. (2009) OCRL1 mutations in Dent 2 patients suggest a mechanism for phenotypic variability. *Nephron Physiol.* **112**, 27–36 <https://doi.org/10.1159/000213506>

- 114 Zhang, X., Hartz, P.A., Philip, E., Racusen, L.C. and Majerus, P.W. (1998) Cell lines from kidney proximal tubules of a patient with Lowe syndrome lack OCRL inositol polyphosphate 5-phosphatase and accumulate phosphatidylinositol 4,5-bisphosphate. *J. Biol. Chem.* **273**, 1574–1582 <https://doi.org/10.1074/jbc.273.3.1574>
- 115 Montjean, R., Aoidi, R., Desbois, P., Rucci, J., Trichet, M., Salomon, R. et al. (2015) OCRL-mutated fibroblasts from patients with Dent-2 disease exhibit INPP5B-independent phenotypic variability relatively to Lowe syndrome cells. *Hum. Mol. Genet.* **24**, 994–1006 <https://doi.org/10.1093/hmg/ddu514>
- 116 Conduit, S.E., Dyson, J.M. and Mitchell, C.A. (2012) Inositol polyphosphate 5-phosphatases; new players in the regulation of cilia and ciliopathies. *FEBS Lett* **586**, 2846–2857 <https://doi.org/10.1016/j.febslet.2012.07.037>
- 117 Janne, P.A., Suchy, S.F., Bernard, D., MacDonald, M., Crawley, J., Grinberg, A. et al. (1998) Functional overlap between murine Inpp5b and Ocr1 may explain why deficiency of the murine ortholog for OCRL1 does not cause Lowe syndrome in mice. *J. Clin. Invest.* **101**, 2042–2053 <https://doi.org/10.1172/JCI2414>
- 118 Bothwell, S.P., Chan, E., Bernardini, I.M., Kuo, Y.M., Gahl, W.A. and Nussbaum, R.L. (2011) Mouse model for Lowe syndrome/Dent disease 2 renal tubulopathy. *J. Am. Soc. Nephrol.* **22**, 443–448 <https://doi.org/10.1681/ASN.2010050565>
- 119 Luo, N., Kumar, A., Conwell, M., Weinreb, R.N., Anderson, R. and Sun, Y. (2013) Compensatory role of inositol 5-phosphatase INPP5B to OCRL in primary cilia formation in oculocerebrorenal syndrome of Lowe. *PLoS ONE* **8**, e66727 <https://doi.org/10.1371/journal.pone.0066727>
- 120 Jackson, S.P., Schoenwaelder, S.M., Matzaris, M., Brown, S. and Mitchell, C.A. (1995) Phosphatidylinositol 3,4,5-trisphosphate is a substrate for the 75 kDa inositol polyphosphate 5-phosphatase and a novel 5-phosphatase which forms a complex with the p85/p110 form of phosphoinositide 3-kinase. *EMBO J.* **14**, 4490–4500 <https://doi.org/10.1002/j.1460-2075.1995.tb00128.x>
- 121 Matzaris, M., Jackson, S.P., Laxminarayan, K.M., Speed, C.J. and Mitchell, C.A. (1994) Identification and characterization of the phosphatidylinositol-(4,5)-bisphosphate 5-phosphatase in human platelets. *J. Biol. Chem.* **269**, 3397–3402 PMID:8106379
- 122 Williams, C., Choudhury, R., McKenzie, E. and Lowe, M. (2007) Targeting of the type II inositol polyphosphate 5-phosphatase INPP5B to the early secretory pathway. *J. Cell Sci.* **120**, 3941–3951 <https://doi.org/10.1242/jcs.014423>
- 123 Shin, H.W., Hayashi, M., Christoforidis, S., Lacas-Gervais, S., Hoepfner, S., Wenk, M.R. et al. (2005) An enzymatic cascade of Rab5 effectors regulates phosphoinositide turnover in the endocytic pathway. *J. Cell Biol.* **170**, 607–618 <https://doi.org/10.1083/jcb.200505128>
- 124 Bohdanowicz, M., Cosio, G., Backer, J.M. and Grinstein, S. (2010) Class I and class III phosphoinositide 3-kinases are required for actin polymerization that propels phagosomes. *J. Cell Biol.* **191**, 999–1012 <https://doi.org/10.1083/jcb.201004005>
- 125 Vieira, O.V., Gaus, K., Verkade, P., Fullekrug, J., Vaz, W.L. and Simons, K. (2006) FAPP2, cilium formation, and compartmentalization of the apical membrane in polarized Madin-Darby canine kidney (MDCK) cells. *Proc. Natl Acad. Sci. U.S.A.* **103**, 18556–18561 <https://doi.org/10.1073/pnas.0608291103>
- 126 Jensen, V.L., Li, C., Bowie, R.V., Clarke, L., Mohan, S., Blacque, O.E. et al. (2015) Formation of the transition zone by Mks5/Rpgrip1L establishes a ciliary zone of exclusion (CIZE) that compartmentalises ciliary signalling proteins and controls PIP2 ciliary abundance. *EMBO J.* **34**, 2537–2556 <https://doi.org/10.15252/emboj.201488044>
- 127 Tanos, B.E., Yang, H.J., Soni, R., Wang, W.J., Macaluso, F.P., Asara, J.M. et al. (2013) Centriole distal appendages promote membrane docking, leading to cilia initiation. *Genes Dev.* **27**, 163–168 <https://doi.org/10.1101/gad.207043.112>
- 128 Spektor, A., Tsang, W.Y., Khoo, D. and Dynlacht, B.D. (2007) Cep97 and CP110 suppress a cilia assembly program. *Cell* **130**, 678–690 <https://doi.org/10.1016/j.cell.2007.06.027>
- 129 Williams, C.L., Li, C., Kida, K., Inglis, P.N., Mohan, S., Semenc, L. et al. (2011) MKS and NPHP modules cooperate to establish basal body/transition zone membrane associations and ciliary gate function during ciliogenesis. *J. Cell Biol.* **192**, 1023–1041 <https://doi.org/10.1083/jcb.201012116>
- 130 Goetz, S.C., Liem, Jr, K.F. and Anderson, K.V. (2012) The spinocerebellar ataxia-associated gene Tau tubulin kinase 2 controls the initiation of ciliogenesis. *Cell* **151**, 847–858 <https://doi.org/10.1016/j.cell.2012.10.010>
- 131 Cajanek, L. and Nigg, E.A. (2014) Cep164 triggers ciliogenesis by recruiting Tau tubulin kinase 2 to the mother centriole. *Proc. Natl Acad. Sci. U.S.A.* **111**, E2841–E2850 <https://doi.org/10.1073/pnas.1401777111>
- 132 Kim, J., Lee, J.E., Heynen-Genel, S., Suyama, E., Ono, K., Lee, K. et al. (2010) Functional genomic screen for modulators of ciliogenesis and cilium length. *Nature* **464**, 1048–1051 <https://doi.org/10.1038/nature08895>
- 133 Nachury, M.V., Loktev, A.V., Zhang, Q., Westlake, C.J., Peranen, J., Merdes, A. et al. (2007) A core complex of BBS proteins cooperates with the GTPase Rab8 to promote ciliary membrane biogenesis. *Cell* **129**, 1201–1213 <https://doi.org/10.1016/j.cell.2007.03.053>
- 134 Feng, S., Knodler, A., Ren, J., Zhang, J., Zhang, X., Hong, Y. et al. (2012) A Rab8 guanine nucleotide exchange factor-effector interaction network regulates primary ciliogenesis. *J. Biol. Chem.* **287**, 15602–15609 <https://doi.org/10.1074/jbc.M111.333245>
- 135 Knodler, A., Feng, S., Zhang, J., Zhang, X., Das, A., Peranen, J. et al. (2010) Coordination of Rab8 and Rab11 in primary ciliogenesis. *Proc. Natl Acad. Sci. U.S.A.* **107**, 6346–6351 <https://doi.org/10.1073/pnas.1002401107>
- 136 Westlake, C.J., Baye, L.M., Nachury, M.V., Wright, K.J., Ervin, K.E., Phu, L. et al. (2011) Primary cilia membrane assembly is initiated by Rab11 and transport protein particle II (TRAPP II) complex-dependent trafficking of Rabin8 to the centrosome. *Proc. Natl Acad. Sci. U.S.A.* **108**, 2759–2764 <https://doi.org/10.1073/pnas.1018823108>
- 137 Boukhalfa, A., Nascimbeni, A.C., Ramel, D., Dupont, N., Hirsch, E., Gayral, S. et al. (2020) PI3KC2alpha-dependent and VPS34-independent generation of PI3P controls primary cilium-mediated autophagy in response to shear stress. *Nat. Commun.* **11**, 294 <https://doi.org/10.1038/s41467-019-14086-1>
- 138 Han, S., Miyoshi, K., Shikada, S., Amano, G., Wang, Y., Yoshimura, T. et al. (2019) TULP3 is required for localization of membrane-associated proteins ARL13B and INPP5E to primary cilia. *Biochem. Biophys. Res. Commun.* **509**, 227–234 <https://doi.org/10.1016/j.bbrc.2018.12.109>
- 139 Mukhopadhyay, S., Wen, X., Chih, B., Nelson, C.D., Lane, W.S., Scales, S.J. et al. (2010) TULP3 bridges the IFT-A complex and membrane phosphoinositides to promote trafficking of G protein-coupled receptors into primary cilia. *Genes Dev.* **24**, 2180–2193 <https://doi.org/10.1101/gad.1966210>
- 140 Santagata, S., Boggon, T.J., Baird, C.L., Gomez, C.A., Zhao, J., Shan, W.S. et al. (2001) G-protein signaling through tubby proteins. *Science* **292**, 2041–2050 <https://doi.org/10.1126/science.1061233>
- 141 Senju, Y. and Lappalainen, P. (2019) Regulation of actin dynamics by PI(4,5)P2 in cell migration and endocytosis. *Curr. Opin. Cell Biol.* **56**, 7–13 <https://doi.org/10.1016/j.ceb.2018.08.003>

- 142 Nager, A.R., Goldstein, J.S., Herranz-Perez, V., Portran, D., Ye, F., Garcia-Verdugo, J.M. et al. (2017) An actin network dispatches ciliary GPCRs into extracellular vesicles to modulate signaling. *Cell* **168**, 252–263.e214 <https://doi.org/10.1016/j.cell.2016.11.036>
- 143 Hu, Q., Milenkovic, L., Jin, H., Scott, M.P., Nachury, M.V., Spiliotis, E.T. et al. (2010) A septin diffusion barrier at the base of the primary cilium maintains ciliary membrane protein distribution. *Science* **329**, 436–439 <https://doi.org/10.1126/science.1191054>
- 144 Ghossoub, R., Hu, Q., Failler, M., Rouyez, M.C., Spitzbarth, B., Mostowy, S. et al. (2013) Septins 2, 7 and 9 and MAP4 colocalize along the axoneme in the primary cilium and control ciliary length. *J. Cell Sci.* **126**, 2583–2594 <https://doi.org/10.1242/jcs.111377>
- 145 Mostowy, S. and Cossart, P. (2012) Septins: the fourth component of the cytoskeleton. *Nat. Rev. Mol. Cell Biol.* **13**, 183–194 <https://doi.org/10.1038/nrm3284>
- 146 Pal, K., Hwang, S.H., Somatilaka, B., Badgandi, H., Jackson, P.K., DeFea, K. et al. (2016) Smoothed determines beta-arrestin-mediated removal of the G protein-coupled receptor Gpr161 from the primary cilium. *J. Cell Biol.* **212**, 861–875 <https://doi.org/10.1083/jcb.201506132>
- 147 Gupta, A., Fabian, L. and Brill, J.A. (2018) Phosphatidylinositol 4,5-bisphosphate regulates cilium transition zone maturation in *Drosophila melanogaster*. *J. Cell Sci.* **131**, jcs218297 <https://doi.org/10.1242/jcs.218297>
- 148 Kim, S., Lee, K., Choi, J.H., Ringstad, N. and Dynlacht, B.D. (2015) Nek2 activation of Kif24 ensures cilium disassembly during the cell cycle. *Nat. Commun.* **6**, 8087 <https://doi.org/10.1038/ncomms9087>
- 149 Inaba, H., Goto, H., Kasahara, K., Kumamoto, K., Yonemura, S., Inoko, A. et al. (2016) Ndel1 suppresses ciliogenesis in proliferating cells by regulating the trichoplein-Aurora A pathway. *J. Cell Biol.* **212**, 409–423 <https://doi.org/10.1083/jcb.201507046>
- 150 Inoko, A., Matsuyama, M., Goto, H., Ohmuro-Matsuyama, Y., Hayashi, Y., Enomoto, M. et al. (2012) Trichoplein and aurora A block aberrant primary cilia assembly in proliferating cells. *J. Cell Biol.* **197**, 391–405 <https://doi.org/10.1083/jcb.201106101>
- 151 Kasahara, K., Aoki, H., Kiyono, T., Wang, S., Kagiwada, H., Yuge, M. et al. (2018) EGF receptor kinase suppresses ciliogenesis through activation of USP8 deubiquitinase. *Nat. Commun.* **9**, 758 <https://doi.org/10.1038/s41467-018-03117-y>
- 152 Sarbassov, D.D., Guertin, D.A., Ali, S.M. and Sabatini, D.M. (2005) Phosphorylation and regulation of Akt/PKB by the rictor-mTOR complex. *Science* **307**, 1098–1101 <https://doi.org/10.1126/science.1106148>
- 153 Malek, M., Kielkowska, A., Chessa, T., Anderson, K.E., Barneda, D., Pir, P. et al. (2017) PTEN regulates PI(3,4)P2 signaling downstream of class I PI3K. *Mol. Cell.* **68**, 566–580.e510 <https://doi.org/10.1016/j.molcel.2017.09.024>
- 154 Shnitsar, I., Bashkurov, M., Masson, G.R., Ogunjimi, A.A., Mosessian, S., Cabeza, E.A. et al. (2015) PTEN regulates cilia through dishevelled. *Nat. Commun.* **6**, 8388 <https://doi.org/10.1038/ncomms9388>
- 155 Yeh, C., Li, A., Chuang, J.Z., Saito, M., Caceres, A. and Sung, C.H. (2013) IGF-1 activates a cilium-localized noncanonical Gbetagamma signaling pathway that regulates cell-cycle progression. *Dev. Cell* **26**, 358–368 <https://doi.org/10.1016/j.devcel.2013.07.014>
- 156 Nielsen, B.S., Malinda, R.R., Schmid, F.M., Pedersen, S.F., Christensen, S.T. and Pedersen, L.B. (2015) PDGFRbeta and oncogenic mutant PDGFRalpha D842V promote disassembly of primary cilia through a PLCgamma- and AURKA-dependent mechanism. *J. Cell Sci.* **128**, 3543–3549 <https://doi.org/10.1242/jcs.173559>
- 157 Frew, I.J., Thoma, C.R., Georgiev, S., Minola, A., Hitz, M., Montani, M. et al. (2008) pVHL and PTEN tumour suppressor proteins cooperatively suppress kidney cyst formation. *EMBO J.* **27**, 1747–1757 <https://doi.org/10.1038/emboj.2008.96>
- 158 Zhu, D., Shi, S., Wang, H. and Liao, K. (2009) Growth arrest induces primary-cilium formation and sensitizes IGF-1-receptor signaling during differentiation induction of 3T3-L1 preadipocytes. *J. Cell Sci.* **122**, 2760–2768 <https://doi.org/10.1242/jcs.046276>
- 159 Thoma, C.R., Frew, I.J., Hoerner, C.R., Montani, M., Moch, H. and Krek, W. (2007) pVHL and GSK3beta are components of a primary cilium-maintenance signalling network. *Nat. Cell Biol.* **9**, 588–595 <https://doi.org/10.1038/ncb1579>
- 160 Zhang, B., Zhang, T., Wang, G., Chi, W., Jiang, Q. et al. (2015) GSK3beta-Dzip1-Rab8 cascade regulates ciliogenesis after mitosis. *PLoS Biol.* **13**, e1002129 <https://doi.org/10.1371/journal.pbio.1002129>
- 161 Beurel, E., Grieco, S.F. and Jope, R.S. (2015) Glycogen synthase kinase-3 (GSK3): regulation, actions, and diseases. *Pharmacol. Ther.* **148**, 114–131 <https://doi.org/10.1016/j.pharmthera.2014.11.016>
- 162 Kool, M., Jones, D.T., Jager, N., Northcott, P.A., Pugh, T.J., Hovestadt, V. et al. (2014) Genome sequencing of SHH medulloblastoma predicts genotype-related response to Smoothed inhibition. *Cancer Cell* **25**, 393–405 <https://doi.org/10.1016/j.ccr.2014.02.004>
- 163 Han, Y.G., Kim, H.J., Dlugosz, A.A., Ellison, D.W., Gilbertson, R.J. and Alvarez-Buylla, A. (2009) Dual and opposing roles of primary cilia in medulloblastoma development. *Nat. Med.* **15**, 1062–1065 <https://doi.org/10.1038/nm.2020>
- 164 Eramo, M.J. and Mitchell, C.A. (2016) Regulation of PtdIns(3,4,5)P3/Akt signalling by inositol polyphosphate 5-phosphatases. *Biochem. Soc. Trans.* **44**, 240–252 <https://doi.org/10.1042/BST20150214>
- 165 Ooms, L.M., Binge, L.C., Davies, E.M., Rahman, P., Conway, J.R., Gurung, R. et al. (2015) The inositol polyphosphate 5-phosphatase PIPP regulates AKT1-dependent breast cancer growth and metastasis. *Cancer Cell* **28**, 155–169 <https://doi.org/10.1016/j.ccell.2015.07.003>
- 166 Bertelli, D.F., Coope, A., Caricilli, A.M., Prada, P.O., Saad, M.J., Velloso, L.A. et al. (2013) Inhibition of 72 kDa inositol polyphosphate 5-phosphatase E improves insulin signal transduction in diet-induced obesity. *J. Endocrinol.* **217**, 131–140 <https://doi.org/10.1530/JOE-12-0562>
- 167 Liu, Q., Sasaki, T., Koziaradski, I., Wakeham, A., Itie, A., Dumont, D.J. et al. (1999) SHIP is a negative regulator of growth factor receptor-mediated PKB/Akt activation and myeloid cell survival. *Genes Dev.* **13**, 786–791 <https://doi.org/10.1101/gad.13.7.786>
- 168 Brauweiler, A., Tamir, I., Dal Porto, J., Benschop, R.J., Helgason, C.D., Humphries, R.K. et al. (2000) Differential regulation of B cell development, activation, and death by the src homology 2 domain-containing 5' inositol phosphatase (SHIP). *J. Exp. Med.* **191**, 1545–1554 <https://doi.org/10.1084/jem.191.9.1545>
- 169 Sleeman, M.W., Wortley, K.E., Lai, K.M., Gowen, L.C., Kintner, J., Kline, W.O. et al. (2005) Absence of the lipid phosphatase SHIP2 confers resistance to dietary obesity. *Nat. Med.* **11**, 199–205 <https://doi.org/10.1038/nm1178>
- 170 Ijuin, T. and Takenawa, T. (2003) SKIP negatively regulates insulin-induced GLUT4 translocation and membrane ruffle formation. *Mol. Cell. Biol.* **23**, 1209–1220 <https://doi.org/10.1128/MCB.23.4.1209-1220.2003>
- 171 Xiong, Q., Deng, C.Y., Chai, J., Jiang, S.W., Xiong, Y.Z., Li, F.E. et al. (2009) Knockdown of endogenous SKIP gene enhanced insulin-induced glycogen synthesis signaling in differentiating C2C12 myoblasts. *BMB Rep.* **42**, 119–124 <https://doi.org/10.5483/BMBRep.2009.42.2.119>
- 172 Ijuin, T., Yu, Y.E., Mizutani, K., Pao, A., Tateya, S., Tamori, Y. et al. (2008) Increased insulin action in SKIP heterozygous knockout mice. *Mol. Cell. Biol.* **28**, 5184–5195 <https://doi.org/10.1128/MCB.01990-06>
- 173 Lai, Y. and Jiang, Y. (2020) Reciprocal regulation between primary cilia and mTORC1. *Genes (Basel)* **11**, 711 <https://doi.org/10.3390/genes11060711>



- 174 Jin, H., White, S.R., Shida, T., Schulz, S., Aguiar, M., Gygi, S.P. et al. (2010) The conserved Bardet-Biedl syndrome proteins assemble a coat that traffics membrane proteins to cilia. *Cell* **141**, 1208–1219 <https://doi.org/10.1016/j.cell.2010.05.015>
- 175 Dean, S., Moreira-Leite, F., Varga, V. and Gull, K. (2016) Cilium transition zone proteome reveals compartmentalization and differential dynamics of ciliopathy complexes. *Proc. Natl Acad. Sci. U.S.A.* **113**, E5135–E5143 <https://doi.org/10.1073/pnas.1604258113>
- 176 Tsang, S.H., Aycinena, A.R.P. and Sharma, T. (2018) Ciliopathy: Bardet-Biedl syndrome. *Adv. Exp. Med. Biol.* **1085**, 171–174 [https://doi.org/10.1007/978-3-319-95046-4\\_33](https://doi.org/10.1007/978-3-319-95046-4_33)
- 177 Singh, S.K., Gui, M., Koh, F., Yip, M.C. and Brown, A. (2020) Structure and activation mechanism of the BBSome membrane protein trafficking complex. *eLife* **9**, e53322 <https://doi.org/10.7554/eLife.53322>
- 178 Klink, B.U., Gatsogiannis, C., Hofnagel, O., Wittinghofer, A. and Raunser, S. (2020) Structure of the human BBSome core complex. *eLife* **9**, e53910 <https://doi.org/10.7554/eLife.53910>
- 179 Layton, M.J., Rynkiewicz, N.K., Ivetac, I., Horan, K.A., Mitchell, C.A. and Phillips, W.A. (2014) Assessing the subcellular distribution of oncogenic phosphoinositide 3-kinase using microinjection into live cells. *Biosci. Rep.* **34**, e00104 <https://doi.org/10.1042/BSR20130133>
- 180 Hammond, G.R. and Balla, T. (2015) Polyphosphoinositide binding domains: key to inositol lipid biology. *Biochim. Biophys. Acta* **1851**, 746–758 <https://doi.org/10.1016/j.bbailip.2015.02.013>
- 181 Tsuji, T., Takatori, S. and Fujimoto, T. (2019) Definition of phosphoinositide distribution in the nanoscale. *Curr. Opin. Cell Biol.* **57**, 33–39 <https://doi.org/10.1016/j.ccb.2018.10.008>
- 182 Hammond, G.R., Schiavo, G. and Irvine, R.F. (2009) Immunocytochemical techniques reveal multiple, distinct cellular pools of PtdIns4P and PtdIns(4,5)P (2). *Biochem. J.* **422**, 23–35 <https://doi.org/10.1042/BJ20090428>
- 183 Pagano, R.E., Sepanski, M.A. and Martin, O.C. (1989) Molecular trapping of a fluorescent ceramide analogue at the Golgi apparatus of fixed cells: interaction with endogenous lipids provides a trans-Golgi marker for both light and electron microscopy. *J. Cell Biol.* **109**, 2067–2079 <https://doi.org/10.1083/jcb.109.5.2067>
